# Supplementary material for: Shape-shifting in contorted dibenzotetrathienocoronenes
Source: Royal Society of Chemistry journal article supplement (doi:10.1039/c1sc00156f), 2011-05-18

## Supplementary Information

# Shape-Shifting in Contorted Dibenzotetrathienocoronenes

Chien-Yang Chiu, Bumjung Kim, Alon A. Gorodetsky, Wesley Sattler, Sujun Wei, Aaron Sattler,  
Michael Steigerwald, and Colin Nuckolls\*

*Department of Chemistry and The Center for Electronics of Molecular Nanostructures,  
Columbia University, New York, New York 10027.* AUTHOR EMAIL ADDRESS:  
cn37@columbia.edu

## I. Synthesis

**General.** All reactions were run in oven-dried glassware (130 °C), and monitored by TLC using silica gel 60 F<sub>254</sub> pre-coated plates (EM Science). Anhydrous and oxygen-free solvents were obtained from a Schlenk manifold system with purification columns packed with activated alumina and supported copper catalyst (Glass Contour, Irvine, CA). Column chromatography was performed on a CombiFlash® Rf system using RediSep™ normal phase silica columns (ISCO, Inc., Lincoln, NE). <sup>1</sup>H NMR (300MHz, 400MHz), and <sup>13</sup>C NMR (75MHz, 100MHz) spectra were recorded on Bruker DRX-300 and Bruker DRX-400 spectrometers at room temperature unless otherwise noted. HRMS were recorded on JEOL JMS-HX110A/110A Tandem mass spectrometer. The photochemistry was carried out according to a reported procedure (reference 22 in manuscript). IR spectra were recorded in powder form on Thermo Scientific NICOLET iS10 with SMART iTR module and were shown in Figure S1 for selected molecules. Compound **4a** and **4g** were purchased from Aldrich. Crystal structure of C60 in the co-crystal was modeled as rigid bodies by using FRAG command.

**General Procedure for Synthesis of Compounds 4b-4f.** The synthesis of **4e** is used as example, with the other compounds prepared in identical fashion. A 25-mL two-necked round-bottomed flask was purged with nitrogen, charged with bis(1,5-cyclooctadiene)di- $\mu$ -methoxy-diiridium(I) ([Ir(OMe)(COD)]<sub>2</sub>) (26 mg, 0.04 mmol, Alfa Aesar) and 4,4'-di-*tert*-butyl-2,2'-bipyridine (dtbpy) (21 mg, 0.08 mmol, Aldrich), and purged with nitrogen again. Anhydrous hexane (15 mL) and pinacolborane (0.5g, 1.98

mmol, Frontier Scientific) were then added by syringe, and the flask was immersed in an oil bath at room temperature. The mixture was stirred for 5 min to give a dark red solution and charged with 2-dodecylthiophene (666 mg, 3.96 mmol). The solution was then stirred at 50 °C for 8 - 12 hours. Subsequently, the mixture was removed from the oil bath and allowed to cool to room temperature. After chromatography on a silica gel column (40 % CH<sub>2</sub>Cl<sub>2</sub>: Hexane), product **4e** was isolated as a colorless oil in 86 % yield. <sup>1</sup>H-NMR (400 MHz, CDCl<sub>3</sub>), δ (ppm): 0.89 (t, *J* = 6.8 Hz, 3H), 1.26 (br, 18H), 1.34 (s, 12H), 1.68 (quint, *J* = 7.6 Hz, 2H), 2.85 (t, *J* = 7.6 Hz, 2H), 6.90 (d, *J* = 3.6 Hz, 1H), 7.47 (d, *J* = 3.6 Hz, 1H); <sup>13</sup>C-NMR (100 MHz, CDCl<sub>3</sub>) δ (ppm): 12.27, 22.83, 24.88, 29.22, 29.50, 29.68, 29.78, 30.29, 31.83, 32.06, 83.97, 125.94, 137.48, 153.90; HRMS (FAB+) cald. for C<sub>22</sub>H<sub>39</sub> B<sub>1</sub>O<sub>2</sub>S<sub>1</sub>: 378.2768, found: 378.2774.

**2-(5-butyl-2-thienyl)-4,4,5,5-tetramethyl-1,3,2-dioxaborolane (4b)**. 63%. <sup>1</sup>H-NMR (400 MHz, CDCl<sub>3</sub>), δ (ppm): 0.95 (t, *J* = 7.2 Hz, 3H), 1.34 (br, 12H), 1.41(m, 2H), 1.69 (quint, *J* = 7.6 Hz, 2H), 2.87 (t, *J* = 7.6 Hz, 2H), 6.87 (d, *J* = 3.6 Hz, 1H), 7.50 (d, *J* = 3.6 Hz, 1H); <sup>13</sup>C-NMR (100 MHz, CDCl<sub>3</sub>) δ (ppm): 13.77, 22.08, 24.69, 29.76, 33.76, 83.69, 125.78, 137.33, 153.48; HRMS (FAB+) cald. for C<sub>14</sub>H<sub>23</sub>B<sub>1</sub>O<sub>2</sub>S<sub>1</sub>: 268.1671, found: 268.1576.

**2-(5-hexyl-2-thienyl)-4,4,5,5-tetramethyl-1,3,2-dioxaborolane (4c)**. 88%. <sup>1</sup>H-NMR (400 MHz, CDCl<sub>3</sub>), δ (ppm): 0.95 (t, *J* = 7.2 Hz, 3H), 1.34 (br, 12H), 1.41(m, 2H), 1.69 (quint, *J* = 7.6 Hz, 2H), 2.87 (t, *J* = 7.6 Hz, 2H), 6.87 (d, *J* = 3.6 Hz, 1H), 7.50 (d, *J* = 3.6 Hz, 1H); <sup>13</sup>C-NMR (100 MHz, CDCl<sub>3</sub>) δ (ppm): 14.02, 22.51, 24.67, 28.69, 30.07, 31.53, 31.62, 83.62, 125.71, 137.30, 153.45; HRMS (FAB+) cald. for C<sub>16</sub>H<sub>27</sub> B<sub>1</sub>O<sub>2</sub>S<sub>1</sub>: 294.1828, found: 294.1816.

**2-(5-octyl-2-thienyl)-4,4,5,5-tetramethyl-1,3,2-dioxaborolane (4d)**. 86%. <sup>1</sup>H-NMR (400 MHz, CDCl<sub>3</sub>), δ (ppm): 0.89 (t, *J* = 7.2 Hz, 3H), 1.26 (br, 10H), 1.32(s, 12H), 1.68 (quint, *J* = 7.6 Hz, 2H), 2.85 (t, *J* = 7.6 Hz, 2H), 6.85 (d, *J* = 3.6 Hz, 1H), 7.47 (d, *J* = 3.6 Hz, 1H); <sup>13</sup>C-NMR (100 MHz, CDCl<sub>3</sub>) δ (ppm):

14.24, 22.81, 24.90, 29.23, 29.35, 29.47, 30.32, 31.84, 32.01, 84.01, 125.96, 137.50, 153.94; HRMS (FAB+) cald. for  $C_{18}H_{31}B_1O_2S_1$ : 322.2138, found: 322.2129.

**4,4,5,5-tetramethyl-2-(5-(perfluorohexyl)thiophen-2-yl)-1,3,2-dioxaborolane (4f)**. 56%.  $^1H$ -NMR (400 MHz,  $CDCl_3$ ),  $\delta$  (ppm): 1.38 (s, 12H), 7.51 (d,  $J = 3.6$  Hz, 1H), 7.63 (m, 1H);  $^{13}C$ -NMR (100 MHz,  $CDCl_3$ )  $\delta$  (ppm): 24.88, 84.91, 131.23, 136.79; LRMS (FAB+) cald. for  $C_{16}H_{14}B_1F_{13}O_2S_1$ : 528.06, found: 528.09.

#### General Ramirez Olefination Procedure.

**6,13-bis(dibromomethylene)-6,13-dihdropentacene (3)**.  $CBR_4$  (4.30 g, 12.9 mmol),  $PPh_3$  (6.8 g, 25.8 mmol), and anhydrous toluene (150 ml) were added to a 250 ml two-necked round-bottomed flask and stirred at room temperature for 5 minutes. 6,13-pentacenequinone was then added to the flask and the solution was stirred at 80 °C for 12 hours. The solution was cooled to room temperature, with the precipitate removed by filtration and rinsed with toluene. The filtrate was tried under reduced pressure, and the crude product was subjected to column chromatography (20 %  $CH_2Cl_2$ : Hexane). Compound **3** was isolated as a white solid in 86% yield.  $^1H$ -NMR (400 MHz,  $CDCl_3$ ),  $\delta$  (ppm): 7.51 (m, 4H), 7.85 (m, 4H), 8.26 (s, 4H);  $^{13}C$ -NMR (100 MHz,  $CDCl_3$ )  $\delta$  (ppm): 90.62, 127.30, 128.25, 131.94, 133.46, 139.79; HRMS (FAB+) cald. for  $C_{24}H_{12}Br_4$ : 619.7634, found: 615.7637.

**General procedure for the Suzuki-Miyaura Coupling (5a-5g)**. The synthesis of **5c** is used as example, with the other compounds prepared in identical fashion. 6 ml THF and 1.5 ml  $H_2O$  were added to a 25 ml two-necked round-bottomed flask, and the solution was bubbled with argon for 10 minutes.  $Na_2CO_3$  (1.07 g, 1.01 mol),  $Pd(PPh_3)_2Cl_2$  (70 mg, 0.10 mmol), **3** (784 mg, 126 mmol), and **4c** (1.86 g, 630 mmol) were then added to the solution, and the mixture was stirred at 70 °C for 4 hours. The solution was then cooled to room temperature and washed sequentially with  $H_2O$  and brine. Compound **5c** was isolated *via* column chromatography (10%  $CH_2Cl_2$ : Hexane) as a yellow solid in 98 % yield.  $^1H$ -NMR (400 MHz,  $CDCl_3$ ),  $\delta$  (ppm): 0.88 (t,  $J = 7.2$  Hz, 12H), 1.27 (br, 44H), 1.61 (quint,  $J = 7.2$  Hz, 8H), 2.73 (t,  $J = 7.2$  Hz, 8H),

6.59 (d,  $J = 3.6$  Hz, 4H), 6.90 (d,  $J = 3.6$  Hz, 4H), 7.32 (m, 4H), 7.56 (m, 4H), 7.87 (s, 4H);  $^{13}\text{C}$ -NMR (100 MHz,  $\text{CDCl}_3$ )  $\delta$  (ppm): 14.25, 22.67, 28.78, 30.22, 31.64, 31.72, 123.65, 125.82, 126.19, 126.60, 128.06, 128.45, 131.99, 136.15, 137.36, 140.99, 146.47; LRMS (FAB+) cald. for  $\text{C}_{64}\text{H}_{72}\text{S}_4$ : 968.45, found: 968.66.

**6,13-bis(dithiophen-2-ylmethylene)-6,13-dihydropentacene (5a).** 98%.  $^1\text{H}$ -NMR (400 MHz,  $\text{CDCl}_3$ ),  $\delta$  (ppm): 6.95 (t,  $J = 4.4$  Hz, 4H), 7.16 (d,  $J = 3.6$  Hz, 4H), 7.33 (m, 4H), 7.55 (m, 4H), 7.84 (s, 4H);  $^{13}\text{C}$ -NMR (100 MHz,  $\text{CDCl}_3$ )  $\delta$  (ppm): 125.49, 126.13, 126.21, 126.72, 126.81, 128.10, 128.85, 132.00, 135.65, 138.59, 143.39; HRMS (FAB+) cald. for  $\text{C}_{16}\text{H}_{27}\text{B}_1\text{O}_2\text{S}_1$ : 632.0761, found: 632.0743.

**6,13-bis(bis(5-butylthiophen-2-yl)methylene)-6,13-dihydropentacene (5b).** 87%.  $^1\text{H}$ -NMR (400 MHz,  $\text{CDCl}_3$ ),  $\delta$  (ppm): 0.84 (t,  $J = 7.2$  Hz, 12H), 1.28 (quint, 8H), 1.56 (quint, 8H), 2.71 (t,  $J = 7.2$  Hz, 8H), 6.57 (d,  $J = 3.6$  Hz, 4H), 6.88 (d,  $J = 3.2$  Hz, 4H), 7.30 (m, 4H), 7.54 (m, 4H), 7.84 (s, 4H);  $^{13}\text{C}$ -NMR (100 MHz,  $\text{CDCl}_3$ )  $\delta$  (ppm): 13.92, 22.12, 29.87, 33.78, 123.67, 125.82, 126.17, 126.58, 128.06, 128.45, 131.97, 136.12, 137.35, 140.91, 146.39; HRMS (FAB+) cald. for  $\text{C}_{56}\text{H}_{56}\text{S}_4$ : 856.3265, found: 856.3237.

**6,13-bis(bis(5-octylthiophen-2-yl)methylene)-6,13-dihydropentacene (5d).** 93%.  $^1\text{H}$ -NMR (400 MHz,  $\text{CDCl}_3$ ),  $\delta$  (ppm): 0.95 (t,  $J = 7.2$  Hz, 12H), 1.30 (br, 40H), 1.65 (quint, 8H), 2.77 (t,  $J = 7.2$  Hz, 8H), 6.63 (d,  $J = 3.6$  Hz, 4H), 6.94 (d,  $J = 3.6$  Hz, 4H), 7.35 (m, 4H), 7.60 (m, 4H), 7.91 (s, 4H);  $^{13}\text{C}$ -NMR (100 MHz,  $\text{CDCl}_3$ )  $\delta$  (ppm): 14.29, 22.83, 29.13, 29.36, 29.50, 30.22, 31.70, 32.07, 123.64, 125.81, 126.17, 126.59, 128.05, 128.44, 131.96, 136.13, 137.31, 140.94, 146.44; LRMS (FAB+) cald. for  $\text{C}_{72}\text{H}_{88}\text{S}_4$ : 1080.58, found: 1080.61.

**6,13-bis(bis(5-dodecylthiophen-2-yl)methylene)-6,13-dihydropentacene (5e).** 73%.  $^1\text{H}$ -NMR (400 MHz,  $\text{CDCl}_3$ ),  $\delta$  (ppm): 0.90 (t,  $J = 7.2$  Hz, 12H), 1.28 (br, 72H), 1.60 (quint, 8H), 2.72 (t,  $J = 7.2$  Hz, 8H), 6.58 (d,  $J = 3.6$  Hz, 4H), 6.88 (d,  $J = 3.6$  Hz, 4H), 7.31 (m, 4H), 7.56 (m, 4H), 7.85 (s, 4H);  $^{13}\text{C}$ -NMR (100 MHz,  $\text{CDCl}_3$ )  $\delta$  (ppm): 14.29, 22.87, 29.17, 29.55, 29.73, 29.86, 30.23, 31.72, 32.10, 123.64, 125.82,

126.18, 126.59, 128.06, 128.44, 131.97, 136.15, 137.29, 140.93, 146.47; HRMS (FAB+) cald. for  $C_{88}H_{120}S_4$ : 1306.8384, found: 1306.8359.

**6,13-bis(bis(5-(perfluorohexyl)thiophen-2-yl)methylene)-6,13-dihdropentacene (5f)**. 56%.  $^1H$ -NMR (400 MHz,  $CDCl_3$ ),  $\delta$  (ppm): 7.19 (d,  $J = 3.6$  Hz, 4H), 7.31 (d,  $J = 3.6$  Hz, 4H), 7.37 (m, 4H), 7.51 (m, 4H), 7.77 (s, 4H);  $^{13}C$ -NMR (100 MHz,  $CDCl_3$ )  $\delta$  (ppm): 115.60, 122.60, 127.25, 127.96, 129.26, 130.12, 132.19, 133.63, 147.13, 155.09, 161.08; LRMS (FAB+) cald. for  $C_{64}H_{20}F_{52}S_4$ : 1903.96, found: 1903.30.

**6,13-bis(bis(5'-hexyl-[2,2'-bithiophen]-5-yl)methylene)-6,13-dihdropentacene (5g)**. 53%.  $^1H$ -NMR (400 MHz,  $CDCl_3$ ),  $\delta$  (ppm): 0.90 (t,  $J = 7.2$  Hz, 12H), 1.33 (br, 72H), 1.66 (quint, 8H), 2.76 (t,  $J = 7.2$  Hz, 8H), 6.61 (d,  $J = 3.6$  Hz, 4H), 6.85 (d,  $J = 3.6$  Hz, 4H), 6.94 (d,  $J = 3.6$  Hz, 4H), 7.03 (d,  $J = 3.6$  Hz, 4H), 7.32 (m, 4H), 7.60 (m, 4H), 7.96 (s, 4H);  $^{13}C$ -NMR (100 MHz,  $CDCl_3$ )  $\delta$  (ppm): 14.22, 22.72, 28.90, 30.32, 31.71, 122.59, 123.57, 124.81, 125.01, 126.28, 126.81, 128.23, 129.88, 132.13, 134.84, 135.60, 138.46, 138.68, 141.41, 145.52 ; LRMS (FAB+) cald. for  $C_{80}H_{80}S_8$ : 1296.40, found: 1296.64.

**General Procedure for Synthesis of Dibenzotetrathienocoronenes (1a-1h)**. The synthesis of **1c** is used as example, with the other compounds prepared in identical fashion. A mixture of **5c** (365 mg, 0.37 mmol), iodine (477 mg, 1.89 mmol), and propylene oxide (10 ml) in anhydrous benzene (350 ml) were irradiated with UV light (Hanovia 450 W high-pressure quartz Hg vapor lamp). The whole reaction system was submerged in a water bath and simultaneously cooled by circulating water. The mixture was bubbled with nitrogen during the reaction. After 4 hours, the solvent was removed under reduced pressure, and the product **1c** was isolated by column chromatography (20 %,  $CH_2Cl_2$ : Hexane) as a yellow solid in 91 % yield.  $^1H$ -NMR (400 MHz,  $CDCl_3$ ),  $\delta$  (ppm): 0.99 (t,  $J = 7.2$  Hz, 12H), 1.46 (m, 16H), 1.59 (quint, 8H), 1.97 (quint,  $J = 7.2$  Hz, 8H), 3.10 (t,  $J = 3.6$  Hz, 8H), 7.58 (m, 4H), 8.17 (m, 4H), 8.91 (m, 4H);  $^{13}C$ -NMR (100 MHz,  $CDCl_3$ )  $\delta$  (ppm): 14.36, 22.91, 29.36, 31.17, 31.86, 31.91, 118.90, 120.93, 121.32, 122.38, 123.64, 125.58, 127.54, 128.71, 133.79, 134.00, 146.62 ; HRMS (FAB+) cald. for  $C_{64}H_{64}S_4$ : 960.3891, found: 960.3874.

**Dibenzo[5,6:11,12]coroneno[2,1-b:3,4-b':8,7-b'':9,10-b''']tetrathiophene (1a).** 92%. <sup>1</sup>H-NMR (400 MHz, C<sub>2</sub>D<sub>2</sub>Cl<sub>4</sub>),  $\delta$  (ppm): 7.94 (m, 4H), 8.72 (d,  $J$  = 6.0 Hz, 4H), 9.32 (d,  $J$  = 6.0 Hz, 4H), 9.36 (m, 4H); <sup>13</sup>C-NMR could not be obtained due to the poor solubility of the compound; the crystal structure is available online.

**2,9,12,19-tetrabutyl**dibenzo[5,6:11,12]coroneno[2,1-b:3,4-b':8,7-b'':9,10-b''']tetrathiophene (1b). 89%. <sup>1</sup>H-NMR (300 MHz, CDCl<sub>3</sub>),  $\delta$  (ppm): 1.10 (t,  $J$  = 7.2 Hz, 12H), 1.61 (m, 8H), 1.98 (quint, 8H), 3.17 (t,  $J$  = 7.5 Hz, 8H), 7.66 (m, 4H), 8.28 (s, 4H), 9.02 (m, 4H); <sup>13</sup>C-NMR (75 MHz, CDCl<sub>3</sub>)  $\delta$  (ppm): 13.92, 22.12, 29.87, 33.78, 123.66, 125.82, 126.58, 128.06, 128.45, 131.96, 136.12, 137.96, 140.91, 146.39; HRMS (FAB+) cald. for C<sub>56</sub>H<sub>48</sub>S<sub>4</sub>: 848.2639, found: 848.2650.

**2,9,12,19-tetraoctyl**dibenzo[5,6:11,12]coroneno[2,1-b:3,4-b':8,7-b'':9,10-b''']tetrathiophene (1d). 86%. <sup>1</sup>H-NMR (400 MHz, CDCl<sub>3</sub>),  $\delta$  (ppm): 0.93 (t,  $J$  = 6.8 Hz, 12H), 1.36 (br, 24H), 1.49 (m, 8H), 1.57 (m, 8H), 1.97 (quint,  $J$  = 7.2 Hz, 8H), 3.11 (t,  $J$  = 7.6 Hz, 8H), 7.58 (m, 4H), 8.19 (s, 4H), 8.92 (m, 4H); <sup>13</sup>C-NMR (100 MHz, CDCl<sub>3</sub>)  $\delta$  (ppm): 14.31, 22.89, 29.57, 29.68, 29.70, 31.21, 31.91, 32.13, 118.95, 120.97, 121.40, 122.43, 123.66, 125.63, 127.60, 128.76, 134.07, 146.70; LRMS (FAB+) cald. for C<sub>72</sub>H<sub>80</sub>S<sub>4</sub>: 1072.51, found: 1072.49.

**2,9,12,19-tetradodecyl**dibenzo[5,6:11,12]coroneno[2,1-b:3,4-b':8,7-b'':9,10-b''']tetrathiophene (1e). 92%. <sup>1</sup>H-NMR (400 MHz, CDCl<sub>3</sub>),  $\delta$  (ppm): 0.88 (t,  $J$  = 6.8 Hz, 12H), 1.27 (br, 56H), 1.49 (quint, 8H), 1.60 (quint, 8H), 2.03 (quint,  $J$  = 7.2 Hz, 8H), 3.22 (t,  $J$  = 7.6 Hz, 8H), 7.70 (m, 4H), 8.36 (s, 4H), 9.10 (m, 4H); <sup>13</sup>C-NMR (100 MHz, CDCl<sub>3</sub>)  $\delta$  (ppm): 14.18, 22.83, 29.53, 29.68, 29.70, 31.37, 31.96, 32.10, 121.40, 121.93, 122.85, 123.92, 125.92, 127.92, 128.64, 129.12, 134.24, 134.52, 147.09; HRMS (FAB+) cald. for C<sub>88</sub>H<sub>112</sub>S<sub>4</sub>: 1296.7647, found: 1296.7728.

**2,9,12,19-tetrahexyl**dibenzo[5,6:11,12]coroneno[2,1-b:3,4-b':8,7-b'':9,10-b''']tetrathiophene

**1,1,10,10,11,11,20,20-octaoxide (1h).** Compound 1c (2.3 mg) was dissolved in 10 ml dichloromethane and mCPBA (40 mg) was added at 0 °C. Upon addition of mCPBA, the solution changed from yellow to

orange. The solution was stirred for another 30 minutes and quenched with saturated  $\text{Na}_2\text{CO}_3$ . The crude product was extracted with dichloromethane and dried under vacuum, with **1h** produced as an orange solid in quantitative yield.  $^1\text{H-NMR}$  (400 MHz,  $\text{CDCl}_3$ ),  $\delta$  (ppm): 0.93 (t,  $J= 6.8$  Hz, 12H), 1.40 (m, 12H), 1.56 (m, 12H), 1.98 (quint,  $J= 7.2$  Hz, 8H), 2.91 (t,  $J= 7.6$  Hz, 8H), 7.98 (s, 4H), 8.09 (m, 4H), 8.87 (m, 4H); **1h** is too insoluble for obtaining  $^{13}\text{C-NMR}$ .; LRMS (FAB+) cald. for  $\text{C}_{64}\text{H}_{64}\text{O}_8\text{S}_4$ : 1088.35, found: 1088.73.

**2,9,12,19-tetrakis(perfluorohexyl)dibenzo[5,6:11,12]coroneno[2,1-b:3,4-b':8,7-b'':9,10-b''']**

**tetrathiophene (1f)**. 86%.  $^1\text{H-NMR}$  (400 MHz,  $\text{CDCl}_3$ ),  $\delta$  (ppm): 8.13 (m, 4H), 9.31 (m, 4H), 9.35 (m, 4H); **1f** has poor solubility for obtaining  $^{13}\text{C-NMR}$ .; LRMS (FAB+) cald. for  $\text{C}_{64}\text{H}_{12}\text{F}_{52}\text{S}_4$ : 1896.95, found: 1892.26.

**2,9,12,19-tetrakis(5-hexylthiophen-2-yl)dibenzo[5,6:11,12]coroneno[2,1-b:3,4-b':8,7-b'':9,10-**

**b''']tetrathiophene (1g)**. 89%.  $^1\text{H-NMR}$  (400 MHz,  $\text{CDCl}_3$ ),  $\delta$  (ppm): 1.00 (t,  $J= 6.8$  Hz, 12H), 1.42 (m, 24H), 1.70 (m, 8H), 2.74 (t,  $J= 7.6$  Hz, 8H), 6.52 (d,  $J= 3.2$  Hz, 4H), 6.63 (d,  $J= 3.2$  Hz, 4H), 6.82 (m, 4H), 7.44 (s, 4H), 7.84 (m, 4H);  $^{13}\text{C-NMR}$  (100 MHz,  $\text{CDCl}_3$ )  $\delta$  (ppm): 14.37, 22.92, 29.31, 30.48, 31.70, 31.91, 118.49, 119.20, 120.15, 120.94, 121.14, 124.37, 124.54, 124.85, 126.44, 127.59, 132.65, 133.14, 134.96, 136.33, 145.62; LRMS (FAB+) cald. for  $\text{C}_{80}\text{H}_{72}\text{S}_8$ : 1288.34, found: 1288.47.

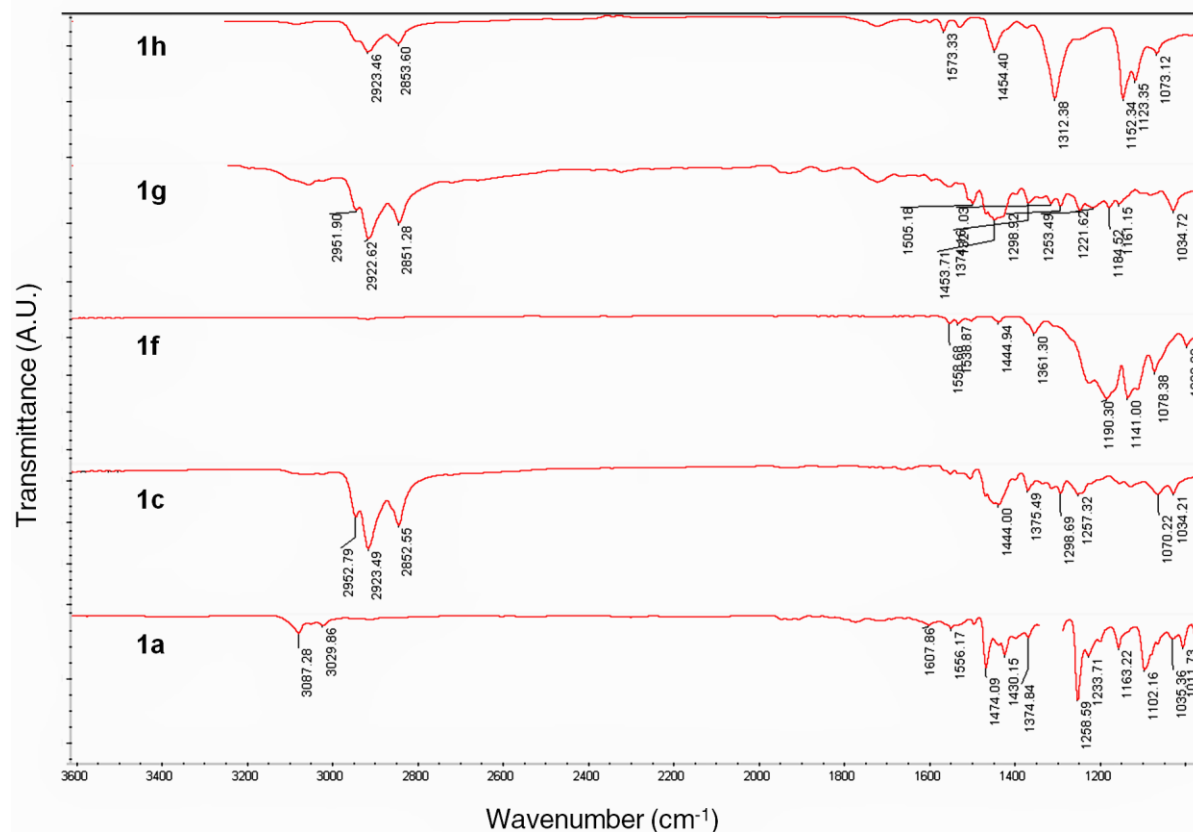

Figure S1. IR spectra for selected molecules to further reinforce the reliability of compounds 1f and 1h due to their poor solubility.

## II. General procedure for cyclic voltammetry Measurements

A CH Instruments electrochemical workstation was used for cyclic voltammetry measurements. The experiments were performed in a single-compartment cell using a platinum wire auxiliary (BAS), a Ag/AgCl reference (BAS), and a glassy carbon working electrode (BAS). Prior to electrochemical measurements, the working electrodes were polished on PSA microcloth (Buehler) with 1.0  $\mu\text{m}$  alumina micropolish and 0.05  $\mu\text{m}$  alumina micropolish and then thoroughly sonicated in water, isopropanol, and dichloromethane to remove residual alumina particles. The supporting electrolyte for electrochemical measurements was 0.1 M tetrabutylammonium tetrafluoroborate (Fluka) in anhydrous



dichloromethane (Fluka). For experimental consistency, electrochemical potentials were standardized against the ferrocene/ferrocenium couple. The HOMO and LUMO energy values were calculated by using a value of -4.8 eV for ferrocene with respect to vacuum. This value is obtained from a value of -4.6 eV below vacuum level for the standard hydrogen electrode (SHE) and a redox potential of 0.2 V versus (SHE) for ferrocene.

### **III. Summary of DFT calculation of electronic structures, and determination of molecular ground-state geometries.**

In order to simplify the calculations, the longer alkyl and perfluoroalkyl groups have been modeled by methyl groups and perfluoromethyl groups in **4c**, **4f** and **4i**. In a similar vein, hexyl-thiophene is modeled with thiophene in **4g**. In all cases, **UD**, **BF** and **TSD** stand for up-down-up-down-up-down, butterfly and up-down-down-twist-up-down conformations, respectively.

In each case the geometries were optimized using the B3LYP functional and the 6-31G\*\* double-zeta basis set. At each optimized geometry the single-point wavefunction was recalculated using the larger 6-311G\*\* triple-zeta basis set in order to determine the conformational energy differences more accurately.

The different conformations were determined by choosing an initial geometry that was as close as possible to the chemically intuitive conformations; the optimum, local-minimum geometries were then determined by typical gradient-based methods. Jaguar (Schrodinger LLC, New York) was used throughout.

### Tetramethyl DBTTC (model for 4c-UD)

6-31G\*\*:

final total energy (Hartree): -3284.07299

HOMO energy (Hartree): -0.17970 (-4.89 eV)

LUMO energy (Hartree): -0.05949 (-1.62 eV)

6-311G\*\*:

final total energy (Hartree): -3284.49385

HOMO energy (Hartree): -0.18791 (-5.11 eV)

LUMO energy (Hartree): -0.06854 (-1.865 eV)

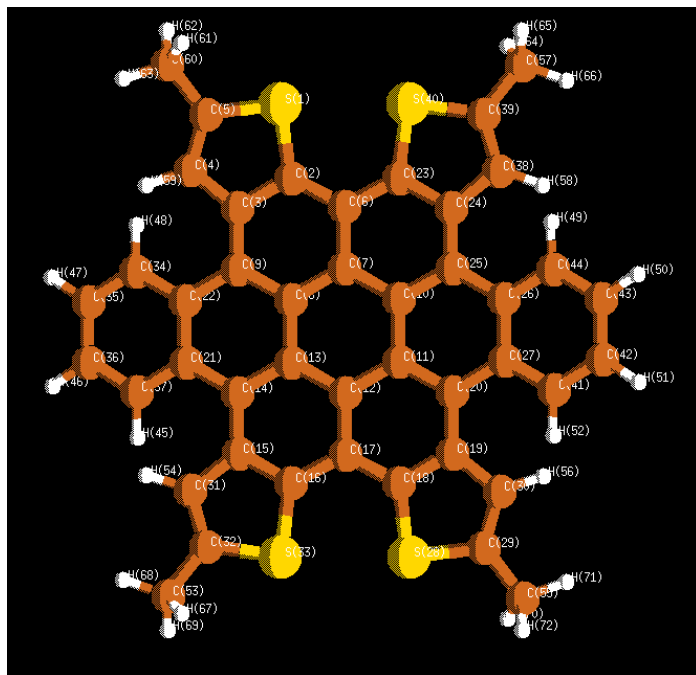

final geometry:

|      | angstroms     |               |               |
|------|---------------|---------------|---------------|
| atom | x             | y             | z             |
| S1   | 0.0147818787  | -0.0278373064 | 0.0018244006  |
| C2   | 0.0061029596  | -0.0087148414 | 1.7625091459  |
| C3   | 1.3087656643  | 0.0174675913  | 2.2737599901  |
| C4   | 2.2906986217  | -0.0505341721 | 1.2192713814  |
| C5   | 1.7671298329  | -0.0757417261 | -0.0362410779 |
| C6   | -1.1375818625 | -0.1005818229 | 2.5984827644  |
| C7   | -0.9218570460 | -0.3468108988 | 3.9896703895  |
| C8   | 0.4059890067  | -0.2537306558 | 4.5334458216  |
| C9   | 1.5048223288  | 0.0551726220  | 3.6959540095  |
| C10  | -2.0341896249 | -0.6853212627 | 4.8363835078  |
| C11  | -1.8179396102 | -0.9342413408 | 6.2466683898  |
| C12  | -0.4893785853 | -0.8422241487 | 6.7904351708  |
| C13  | 0.6217372605  | -0.4981044821 | 5.9448489637  |
| C14  | 1.9300045965  | -0.4143980459 | 6.4777321454  |
| C15  | 2.1649594534  | -0.9351138387 | 7.7945388812  |
| C16  | 1.0730672087  | -1.2218819615 | 8.6223392154  |
| C17  | -0.2710100848 | -1.0952512208 | 8.1799043611  |
| C18  | -1.4144986767 | -1.1983370345 | 9.0151715576  |
| C19  | -2.7179872363 | -1.2217770714 | 8.5047795874  |
| C20  | -2.9166304618 | -1.2473317551 | 7.0824360437  |
| C21  | 2.9620975065  | 0.2432061029  | 5.6986624357  |
| C22  | 2.7537218897  | 0.4703574619  | 4.3071315609  |

|     |               |               |               |
|-----|---------------|---------------|---------------|
| C23 | -2.4795955291 | 0.0330035642  | 2.1551309241  |
| C24 | -3.5722010846 | -0.2406875477 | 2.9851144684  |
| C25 | -3.3415992785 | -0.7616207733 | 4.3027077560  |
| C26 | -4.3763235369 | -1.4170500891 | 5.0786084573  |
| C27 | -4.1676775046 | -1.6542851320 | 6.4685612869  |
| S28 | -1.4213126772 | -1.1971876992 | 10.7761119272 |
| C29 | -3.1735434951 | -1.1533554172 | 10.8164880583 |
| C30 | -3.6983938295 | -1.1655999567 | 9.5613440783  |
| C31 | 3.4132842179  | -1.2914295152 | 8.4226061853  |
| C32 | 3.2872595381  | -1.7829566901 | 9.6848478083  |
| S33 | 1.6063171703  | -1.8432527848 | 10.1815259704 |
| C34 | 3.7200618592  | 1.2269061033  | 3.5976672542  |
| C35 | 4.8559504886  | 1.7181888302  | 4.2093937816  |
| C36 | 5.0554604261  | 1.5034490298  | 5.5806500920  |
| C37 | 4.1162526244  | 0.7978035500  | 6.3057556663  |
| C38 | -4.8183078327 | 0.1213627284  | 2.3557556199  |
| C39 | -4.6896442750 | 0.6039656277  | 1.0903785181  |
| S40 | -3.0086277906 | 0.6491750751  | 0.5926019746  |
| C41 | -5.1373325131 | -2.4118096131 | 7.1722815852  |
| C42 | -6.2758267723 | -2.8931711693 | 6.5572450806  |
| C43 | -6.4752211313 | -2.6677761427 | 5.1874969295  |
| C44 | -5.5330021497 | -1.9615733165 | 4.4669434200  |
| H45 | 4.2326915046  | 0.7299496950  | 7.3776300190  |
| H46 | 5.9174759211  | 1.9316719901  | 6.0837961188  |
| H47 | 5.5627074590  | 2.3131357499  | 3.6382688286  |

|     |               |               |               |
|-----|---------------|---------------|---------------|
| H48 | 3.5302288042  | 1.4966124875  | 2.5690325118  |
| H49 | -5.6487745262 | -1.8854236965 | 3.3947426628  |
| H50 | -7.3392710121 | -3.0887255231 | 4.6816331536  |
| H51 | -6.9849766701 | -3.4891077194 | 7.1243991675  |
| H52 | -4.9485459501 | -2.6907923927 | 8.1985076926  |
| C53 | 4.3696209400  | -2.2603457035 | 10.6040839814 |
| H54 | 4.3733839596  | -1.2389684828 | 7.9286772753  |
| C55 | -3.9022055857 | -1.0930867102 | 12.1240024441 |
| H56 | -4.7626041266 | -1.0786721126 | 9.3934365502  |
| C57 | -5.7694000869 | 1.0821508232  | 0.1685999620  |
| H58 | -5.7784562972 | 0.0789189931  | 2.8507647131  |
| H59 | 3.3545878871  | -0.1371020847 | 1.3898000224  |
| C60 | 2.4971438850  | -0.1534118804 | -1.3420927126 |
| H61 | 2.1999244377  | -1.0328854843 | -1.9243353531 |
| H62 | 2.3086301309  | 0.7295079466  | -1.9637776513 |
| H63 | 3.5739859412  | -0.2139734659 | -1.1625072410 |
| H64 | -5.6198581421 | 2.1264807933  | -0.1278653472 |
| H65 | -5.8128177616 | 0.4844085318  | -0.7491414305 |
| H66 | -6.7408632950 | 1.0069719312  | 0.6647898668  |
| H67 | 4.2274179061  | -3.3081272934 | 10.8919239099 |
| H68 | 5.3409890093  | -2.1740324399 | 10.1095200117 |
| H69 | 4.4076080860  | -1.6697101208 | 11.5266784338 |
| H70 | -3.6045884412 | -0.2214157205 | 12.7176455764 |
| H71 | -4.9792573632 | -1.0305052262 | 11.9464827129 |
| H72 | -3.7126974042 | -1.9842247188 | 12.7335584312 |

### Tetramethyl DBTTC (model for 4c-BF)

6-31G\*\*:

Final total energy (Hartree): -3284.07419

HOMO energy (Hartree): -0.17842 (-4.85625 eV)

LUMO energy (Hartree): -0.05903 (-1.60668 eV)

6-311g\*\*:

Final total energy (Hartree): -3284.49494

HOMO energy (Hartree): -0.18668 (-5.08107 eV)

LUMO energy (Hartree): -0.06811 (-1.85382 eV)

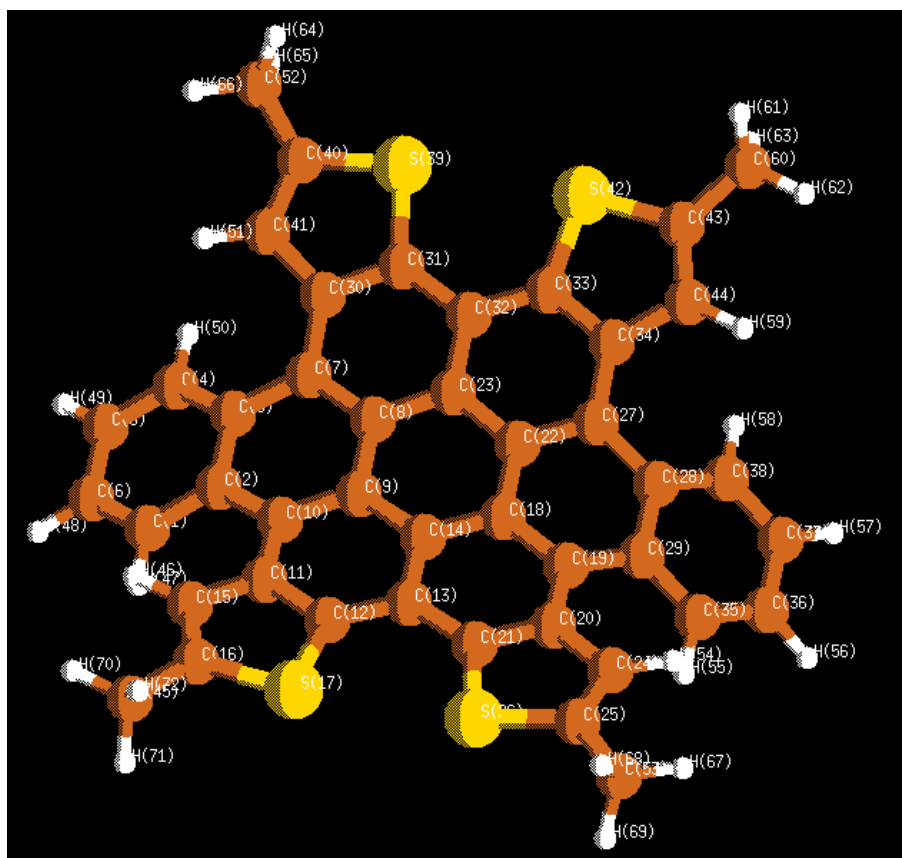

final geometry:

|      | angstroms     |               |               |
|------|---------------|---------------|---------------|
| atom | x             | y             | z             |
| C1   | 0.0071289903  | -0.0906763913 | 0.0069146366  |
| C2   | -0.0007965446 | -0.0341180764 | 1.4218856644  |
| C3   | 1.2493800618  | 0.0026277112  | 2.1053185049  |
| C4   | 2.4379828806  | -0.0155942085 | 1.3352231455  |
| C5   | 2.4126261667  | -0.0285836684 | -0.0457751049 |
| C6   | 1.1827999264  | -0.0678852879 | -0.7178950894 |
| C7   | 1.2708055727  | -0.0895804612 | 3.5541567307  |
| C8   | 0.1263897311  | -0.5956956818 | 4.2106158368  |
| C9   | -1.1458564369 | -0.6207526674 | 3.5190155528  |
| C10  | -1.2287596612 | -0.1491404095 | 2.1895341423  |
| C11  | -2.5242179855 | 0.1409695347  | 1.6484153349  |
| C12  | -3.6734037465 | -0.2549638266 | 2.3502073341  |
| C13  | -3.6116761123 | -0.9207643681 | 3.6056218171  |
| C14  | -2.3226343419 | -1.0733111065 | 4.2062637106  |
| C15  | -2.8598235524 | 0.8871651164  | 0.4611181208  |
| C16  | -4.1942879397 | 1.0204307537  | 0.2368766646  |
| S17  | -5.1318426950 | 0.2300297745  | 1.4892431213  |
| C18  | -2.1871688885 | -1.7385977334 | 5.4717732928  |
| C19  | -3.3010322862 | -2.3642069655 | 6.0751746986  |
| C20  | -4.6071359913 | -2.0763676751 | 5.5590082199  |
| C21  | -4.7345532520 | -1.3846129401 | 4.3448333945  |
| C22  | -0.9121674955 | -1.7249964368 | 6.1582673988  |

|     |               |               |               |
|-----|---------------|---------------|---------------|
| C23 | 0.2053905235  | -1.0365314418 | 5.5750974871  |
| C24 | -5.8928721629 | -2.3379312113 | 6.1574658646  |
| C25 | -6.9538023986 | -1.9107584339 | 5.4216326271  |
| S26 | -6.4305440533 | -1.1486427937 | 3.9327478937  |
| C27 | -0.7905130587 | -2.3449435101 | 7.4214603103  |
| C28 | -1.8003004403 | -3.3112507713 | 7.8136484715  |
| C29 | -3.0584382749 | -3.3177512280 | 7.1434331220  |
| C30 | 2.4173424505  | 0.2477326948  | 4.3457225848  |
| C31 | 2.4706131243  | -0.1476866743 | 5.6904943751  |
| C32 | 1.4087224557  | -0.8494067200 | 6.3248825693  |
| C33 | 1.4202919161  | -1.3151980032 | 7.6679193795  |
| C34 | 0.3532598900  | -2.0339031746 | 8.2272618119  |
| C35 | -3.9752996159 | -4.3539731517 | 7.4451160448  |
| C36 | -3.6954748798 | -5.3242808442 | 8.3877269612  |
| C37 | -2.4560897309 | -5.3200086391 | 9.0434918752  |
| C38 | -1.5261198487 | -4.3436007650 | 8.7434646628  |
| S39 | 3.9694658966  | 0.3916165010  | 6.4423973637  |
| C40 | 4.4768234371  | 1.2048578043  | 4.9748201684  |
| C41 | 3.5657106714  | 1.0394216025  | 3.9787738468  |
| S42 | 2.6922766737  | -1.0537348119 | 8.8580385949  |
| C43 | 1.7552815879  | -1.8429879527 | 10.1117151290 |
| C44 | 0.5667986520  | -2.2950185199 | 9.6294209163  |
| C45 | -4.8770450659 | 1.7442930800  | -0.8830709533 |
| H46 | -2.1301578426 | 1.3657307166  | -0.1763852113 |
| H47 | -0.9255006821 | -0.2268820898 | -0.5217928639 |



|     |               |               |               |
|-----|---------------|---------------|---------------|
| H48 | 1.1511369255  | -0.1308901941 | -1.8017457358 |
| H49 | 3.3443498155  | -0.0601845516 | -0.6031332062 |
| H50 | 3.3919541455  | -0.0942075056 | 1.8368819153  |
| H51 | 3.6820525291  | 1.5253449382  | 3.0198653444  |
| C52 | 5.7590325750  | 1.9792029449  | 4.9392652128  |
| C53 | -8.4116699323 | -2.0075105611 | 5.7520944621  |
| H54 | -6.0240802958 | -2.7757743167 | 7.1372958301  |
| H55 | -4.8882728288 | -4.4353029115 | 6.8725556390  |
| H56 | -4.4148145356 | -6.1153729727 | 8.5785757845  |
| H57 | -2.2045207732 | -6.1082829658 | 9.7470717578  |
| H58 | -0.5382112331 | -4.4157159015 | 9.1770450085  |
| H59 | -0.1684978453 | -2.7519761483 | 10.2770069390 |
| C60 | 2.2795138314  | -1.9283220959 | 11.5125879721 |
| H61 | 2.4733172458  | -0.9359399806 | 11.9354581317 |
| H62 | 1.5492010054  | -2.4317277341 | 12.1520638388 |
| H63 | 3.2169885789  | -2.4940066929 | 11.5613703104 |
| H64 | 5.7762092908  | 2.7726891636  | 5.6950249839  |
| H65 | 6.6272627204  | 1.3352817910  | 5.1208108135  |
| H66 | 5.8847426365  | 2.4444049835  | 3.9576434078  |
| H67 | -8.5398946760 | -2.4625911335 | 6.7379498709  |
| H68 | -8.8918316208 | -1.0225727750 | 5.7680231532  |
| H69 | -8.9521855260 | -2.6231596825 | 5.0237998021  |
| H70 | -4.1309024160 | 2.2075632982  | -1.5344737470 |
| H71 | -5.4838723205 | 1.0666582502  | -1.4947008634 |
| H72 | -5.5407523291 | 2.5339234408  | -0.5130058475 |



### Tetramethyl DBTTC (model for 4c-TSD)

6-31G\*\*:

final total energy (Hartree): -3284.06740

HOMO energy (Hartree): -0.17942 (-4.88347 eV)

LUMO energy (Hartree): -0.05972 (-1.62546 eV)

6-311G\*\*:

final total energy (Hartree): -3284.48792

HOMO energy (Hartree): -0.18753 (-5.103 eV)

LUMO energy (Hartree): -0.06866 (-1.868 eV)

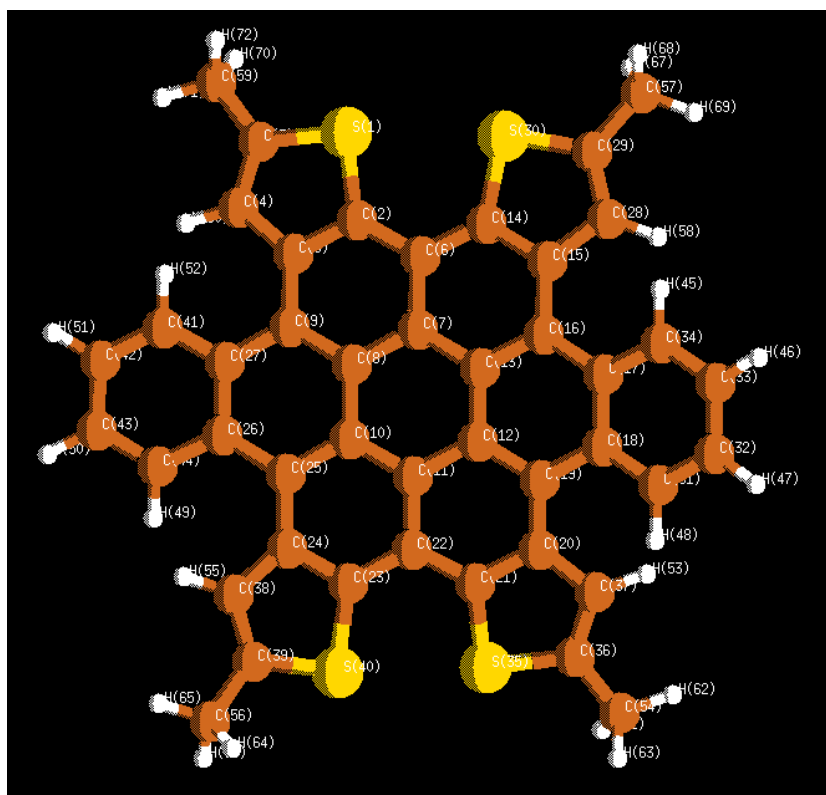

final geometry:

| angstroms |               |              |               |
|-----------|---------------|--------------|---------------|
| atom      | x             | y            | z             |
| S1        | -0.0061846611 | 0.0210408307 | 0.0022204883  |
| C2        | -0.0016044739 | 0.0192569623 | 1.7638499879  |
| C3        | 1.3075277791  | 0.0020999110 | 2.2641003488  |
| C4        | 2.2750618878  | 0.0925111903 | 1.1955181007  |
| C5        | 1.7402329355  | 0.1033080641 | -0.0541851356 |
| C6        | -1.1436643781 | 0.1244934241 | 2.6033162886  |
| C7        | -0.9180662519 | 0.2982950350 | 4.0060280144  |
| C8        | 0.4234245332  | 0.2713964210 | 4.5369596531  |
| C9        | 1.5244401329  | 0.0021415364 | 3.6871270390  |
| C10       | 0.6444767356  | 0.5139639903 | 5.9510395249  |
| C11       | -0.4723081841 | 0.8723419322 | 6.7850951363  |
| C12       | -1.8123038287 | 0.7985951246 | 6.2772216712  |
| C13       | -2.0412609316 | 0.4564405000 | 4.8912071153  |
| C14       | -2.4863752192 | 0.1734464138 | 2.1352748893  |
| C15       | -3.5839480043 | 0.3140222962 | 2.9961973644  |
| C16       | -3.3678077146 | 0.3448815176 | 4.4116599661  |
| C17       | -4.4512516133 | 0.2281421216 | 5.3727048557  |
| C18       | -4.2301210465 | 0.6270269451 | 6.7216095205  |
| C19       | -2.9139032005 | 1.0896473483 | 7.1157269088  |
| C20       | -2.6650684343 | 1.7714188657 | 8.3512449407  |
| C21       | -1.3568305779 | 1.8337517652 | 8.8434950905  |
| C22       | -0.2551545248 | 1.2808322768 | 8.1362676215  |

|     |               |               |               |
|-----|---------------|---------------|---------------|
| C23 | 1.0326675059  | 1.0604399248  | 8.6865577457  |
| C24 | 2.1036583535  | 0.5757203049  | 7.9252058522  |
| C25 | 1.9529425843  | 0.4520064134  | 6.4955895388  |
| C26 | 3.0767604121  | 0.1952949084  | 5.6173486661  |
| C27 | 2.8405457058  | -0.1854862658 | 4.2654577524  |
| C28 | -4.8151982109 | 0.4887764900  | 2.2653700730  |
| C29 | -4.6819944878 | 0.4219205282  | 0.9143542037  |
| S30 | -3.0138081981 | 0.1538398701  | 0.4528410176  |
| C31 | -5.2637458123 | 0.4193422410  | 7.6683553621  |
| C32 | -6.4779889428 | -0.1313964358 | 7.3085671007  |
| C33 | -6.6913676448 | -0.5387249250 | 5.9835734399  |
| C34 | -5.6900402844 | -0.3766758863 | 5.0459988236  |
| S35 | -1.2959442841 | 2.7272076944  | 10.3593139789 |
| C36 | -3.0174210398 | 3.0604797318  | 10.2893914878 |
| C37 | -3.5865404607 | 2.4968343764  | 9.1895747079  |
| C38 | 3.2047200624  | 0.1888033755  | 8.7769043137  |
| C39 | 3.0104957679  | 0.4312202547  | 10.1013282767 |
| S40 | 1.4395531563  | 1.1454317919  | 10.3965285724 |
| C41 | 3.9214537281  | -0.7541920080 | 3.5406947960  |
| C42 | 5.2125367138  | -0.7394963485 | 4.0262949390  |
| C43 | 5.4797253795  | -0.1126627148 | 5.2547885571  |
| C44 | 4.4288532337  | 0.3247418624  | 6.0341989838  |
| H45 | -5.8336135677 | -0.7899032361 | 4.0579078747  |
| H46 | -7.6211475049 | -1.0243126571 | 5.7019438527  |
| H47 | -7.2426455363 | -0.2946696896 | 8.0623693529  |

|     |               |               |               |
|-----|---------------|---------------|---------------|
| H48 | -5.0755565763 | 0.6309121149  | 8.7122331563  |
| H49 | 4.6457447410  | 0.8117737701  | 6.9726586974  |
| H50 | 6.5008334562  | 0.0072396692  | 5.6038735662  |
| H51 | 6.0147968750  | -1.1907132564 | 3.4501518208  |
| H52 | 3.7218058024  | -1.2449088233 | 2.5988791329  |
| H53 | -4.6310439719 | 2.6435042291  | 8.9503691856  |
| C54 | -3.6769735642 | 3.8893324278  | 11.3486989792 |
| H55 | 4.0901170581  | -0.3229096835 | 8.4318645946  |
| C56 | 3.9349163304  | 0.1319689084  | 11.2414256922 |
| C57 | -5.7455382056 | 0.5682436542  | -0.1303448463 |
| H58 | -5.7649981732 | 0.7152966129  | 2.7276284135  |
| C59 | 2.4547770426  | 0.2039715096  | -1.3669213969 |
| H60 | 3.3368117317  | 0.2130693699  | 1.3464456742  |
| H61 | -3.2185853697 | 4.8806678532  | 11.4358641518 |
| H62 | -4.7346905641 | 4.0257419098  | 11.1072245890 |
| H63 | -3.6151938926 | 3.4124707800  | 12.3336664226 |
| H64 | 3.4761125816  | -0.5484472714 | 11.9677626798 |
| H65 | 4.8481595473  | -0.3381727797 | 10.8669773600 |
| H66 | 4.2209899680  | 1.0416256339  | 11.7817173647 |
| H67 | -5.5254784067 | 1.3873714931  | -0.8239950399 |
| H68 | -5.8558320696 | -0.3445757548 | -0.7268119941 |
| H69 | -6.7076293939 | 0.7766102717  | 0.3456128034  |
| H70 | 2.1395187837  | 1.0870575148  | -1.9344414088 |
| H71 | 3.5327129682  | 0.2764014768  | -1.1984470008 |

H72      2.2701860607   -0.6731160722   -1.9979306376

### Tetratrifluoromethyl DBTTC (model for 1f-UD)

6-31G\*\*:

final total energy (Hartree): -4474.90858

HOMO energy (Hartree): -0.20979 (-5.71009 eV)

LUMO energy (Hartree): -0.09137 (-2.486918 eV)

6-311G\*\*:

final total energy (Hartree): -4475.71645950335

HOMO energy (Hartree): -0.21987 (-5.98444 eV)

LUMO energy (Hartree): -0.10232 (-2.78496 eV)

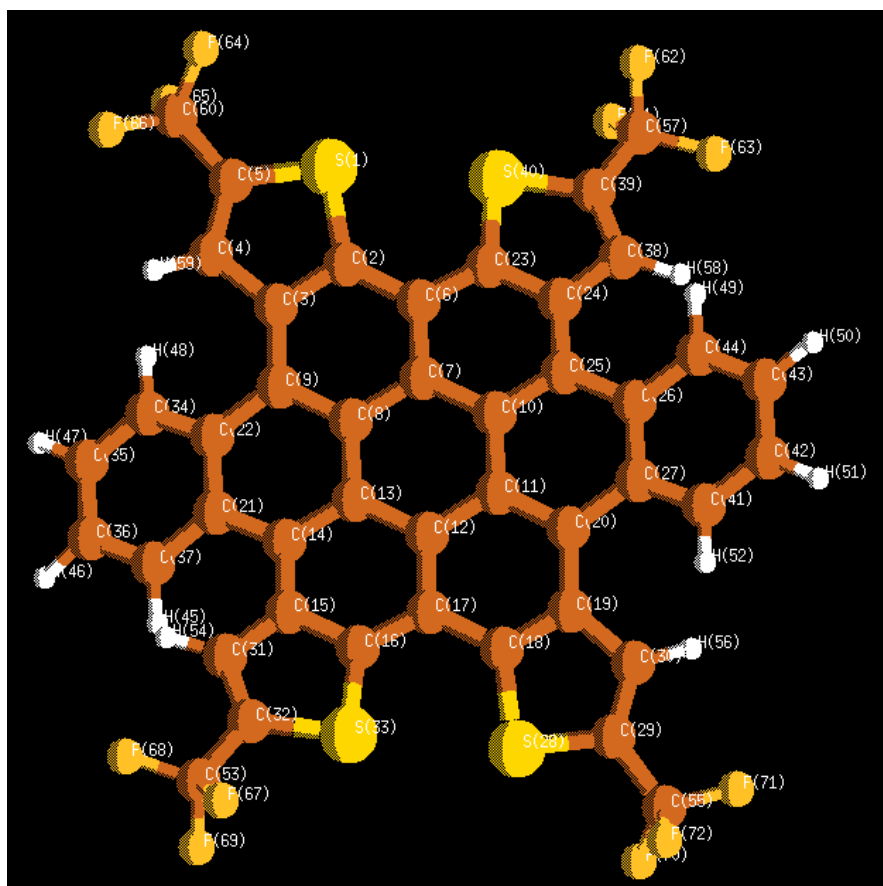



final geometry:

|      | angstroms     |               |               |
|------|---------------|---------------|---------------|
| atom | x             | y             | z             |
| S1   | -0.0189921555 | -0.0205134970 | -0.0127640037 |
| C2   | 0.0007283898  | -0.1206521572 | 1.7410242868  |
| C3   | 1.3070788500  | -0.1134448918 | 2.2473239430  |
| C4   | 2.2796731666  | -0.0934487487 | 1.1855021494  |
| C5   | 1.7209776243  | -0.0184409297 | -0.0516469357 |
| C6   | -1.1388383626 | -0.2320801923 | 2.5812711420  |
| C7   | -0.9293525833 | -0.4896707553 | 3.9678078929  |
| C8   | 0.4048046169  | -0.4353928377 | 4.5043690780  |
| C9   | 1.5065904697  | -0.1249009358 | 3.6703370324  |
| C10  | -2.0549707620 | -0.7745732849 | 4.8217685698  |
| C11  | -1.8385914658 | -1.0315199449 | 6.2336378462  |
| C12  | -0.4979829660 | -1.0084630986 | 6.7631376831  |
| C13  | 0.6199384642  | -0.6986823030 | 5.9110709827  |
| C14  | 1.9318191974  | -0.6449969375 | 6.4378244656  |
| C15  | 2.1608951282  | -1.1656150425 | 7.7555118172  |
| C16  | 1.0669869736  | -1.4294574264 | 8.5895905848  |
| C17  | -0.2748643855 | -1.2724616337 | 8.1480109373  |
| C18  | -1.4099945592 | -1.3276032684 | 8.9984111019  |
| C19  | -2.7226554695 | -1.2768184228 | 8.5086558241  |
| C20  | -2.9433928043 | -1.2813020287 | 7.0844569234  |
| C21  | 2.9703950455  | 0.0134990367  | 5.6701845260  |

|     |               |               |               |
|-----|---------------|---------------|---------------|
| C22 | 2.7593275908  | 0.2718116114  | 4.2852656479  |
| C23 | -2.4741327009 | -0.0635987422 | 2.1337351996  |
| C24 | -3.5821861852 | -0.2739719754 | 2.9654847971  |
| C25 | -3.3714864918 | -0.7819457656 | 4.2975023022  |
| C26 | -4.4356403095 | -1.3619974508 | 5.0950697979  |
| C27 | -4.2255159180 | -1.6044665103 | 6.4856521393  |
| S28 | -1.3606152695 | -1.3424880951 | 10.7527609306 |
| C29 | -3.0954803012 | -1.2059656075 | 10.8195099671 |
| C30 | -3.6738407247 | -1.1735414213 | 9.5882813073  |
| C31 | 3.4048969620  | -1.5056493916 | 8.3927529334  |
| C32 | 3.2504789089  | -1.9475030468 | 9.6684716934  |
| S33 | 1.5806145936  | -2.0130220129 | 10.1668386471 |
| C34 | 3.7236561003  | 1.0458407478  | 3.5924890891  |
| C35 | 4.8644070549  | 1.5155147094  | 4.2108163329  |
| C36 | 5.0687540787  | 1.2659570554  | 5.5750714057  |
| C37 | 4.1277824630  | 0.5504904229  | 6.2870975024  |
| C38 | -4.8031712843 | 0.1346946301  | 2.3126388976  |
| C39 | -4.6086932173 | 0.5720491418  | 1.0384743347  |
| S40 | -2.9388912044 | 0.5356230628  | 0.5528517600  |
| C41 | -5.2380441174 | -2.2837822825 | 7.2089457308  |
| C42 | -6.4186899957 | -2.6826119327 | 6.6150945542  |
| C43 | -6.6205356134 | -2.4531921838 | 5.2465906699  |
| C44 | -5.6386536513 | -1.8259946319 | 4.5065598869  |
| H45 | 4.2457559596  | 0.4708338551  | 7.3576729214  |
| H46 | 5.9324770646  | 1.6802291418  | 6.0860153571  |

|     |               |               |               |
|-----|---------------|---------------|---------------|
| H47 | 5.5684306419  | 2.1247787157  | 3.6523463605  |
| H48 | 3.5295013839  | 1.3564343925  | 2.5772794061  |
| H49 | -5.7672628374 | -1.7568589283 | 3.4362164628  |
| H50 | -7.5203671121 | -2.8121560746 | 4.7563059330  |
| H51 | -7.1615000893 | -3.2195123232 | 7.1972397719  |
| H52 | -5.0571295066 | -2.5732004129 | 8.2335097515  |
| C53 | 4.3432870452  | -2.3156737035 | 10.6194571217 |
| H54 | 4.3723295778  | -1.4683973827 | 7.9162037578  |
| C55 | -3.7679986560 | -1.1159780106 | 12.1521552456 |
| H56 | -4.7358469586 | -1.0261048545 | 9.4630207837  |
| C57 | -5.6212681418 | 1.0810431262  | 0.0640249562  |
| H58 | -5.7756550733 | 0.1577384137  | 2.7809676693  |
| H59 | 3.3471899659  | -0.1688695920 | 1.3228231651  |
| C60 | 2.4349897414  | 0.1505791124  | -1.3531830402 |
| F61 | -5.3030683891 | 2.3181834535  | -0.3798264765 |
| F62 | -5.6988958076 | 0.2896512736  | -1.0303192113 |
| F63 | -6.8471706374 | 1.1409678878  | 0.6179189080  |
| F64 | 1.8833722561  | -0.6009265360 | -2.3305870898 |
| F65 | 2.3878096292  | 1.4348649597  | -1.7773909226 |
| F66 | 3.7341729875  | -0.1906104099 | -1.2418145817 |
| F67 | 4.1348544249  | -3.5225668658 | 11.1881327991 |
| F68 | 5.5349569868  | -2.3523904927 | 9.9885951540  |
| F69 | 4.4442413843  | -1.4216450507 | 11.6294168745 |
| F70 | -3.3031690406 | -0.0736290683 | 12.8768673054 |
| F71 | -5.0997477849 | -0.9636157975 | 12.0160041708 |

F72      -3.5523157278    -2.2270733126    12.8934654589

### Tetratrifluoromethyl DBTTC (model for 1f-BF)

6-31g\*\*:

final total energy (Hartree): -4474.91147

HOMO energy (Hartree): -0.20842 (-5.6728 eV)

LUMO energy (Hartree): -0.08981(-2.44446 eV)

6-311G\*\*:

final total energy (Hartree): -4475.71929

HOMO energy (Hartree): -0.21844 (-5.94552 eV)

LUMO energy (Hartree): -0.10081(-2.74386 eV)

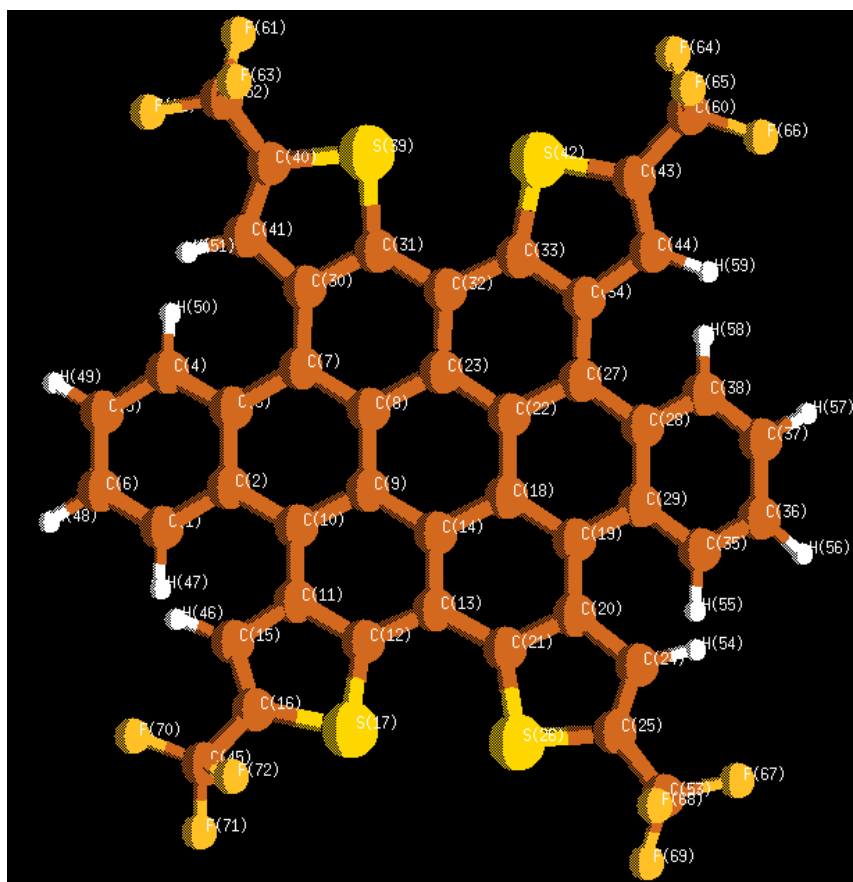

final geometry:

| angstroms |               |               |               |
|-----------|---------------|---------------|---------------|
| atom      | x             | y             | z             |
| C1        | 0.0243897422  | -0.1215134830 | -0.0329325707 |
| C2        | 0.0267665083  | -0.1169965140 | 1.3826870842  |
| C3        | 1.2799655805  | -0.1118152774 | 2.0597726326  |
| C4        | 2.4662787844  | -0.1183597592 | 1.2875675353  |
| C5        | 2.4322880459  | -0.0886650118 | -0.0929061697 |
| C6        | 1.1985050844  | -0.0881558640 | -0.7597935695 |
| C7        | 1.3022798168  | -0.2181089223 | 3.5062280573  |
| C8        | 0.1615051616  | -0.7269098049 | 4.1645537028  |
| C9        | -1.1089926558 | -0.7508839434 | 3.4729956423  |
| C10       | -1.1933343692 | -0.2488250708 | 2.1546980501  |
| C11       | -2.4892917673 | 0.0762852362  | 1.6336176229  |
| C12       | -3.6364221423 | -0.3425042706 | 2.3243799543  |
| C13       | -3.5679570092 | -1.0560074752 | 3.5530161873  |
| C14       | -2.2847656011 | -1.2116460559 | 4.1573418179  |
| C15       | -2.8248112383 | 0.9080858497  | 0.5078580234  |
| C16       | -4.1639815194 | 1.0731390491  | 0.3461196173  |
| S17       | -5.1035392701 | 0.2218190789  | 1.5400128701  |
| C18       | -2.1581143631 | -1.8615070859 | 5.4338988502  |
| C19       | -3.2782162398 | -2.4734385844 | 6.0451886131  |
| C20       | -4.5824983032 | -2.2056823751 | 5.5019356743  |
| C21       | -4.6946346294 | -1.5308531188 | 4.2749619405  |
| C22       | -0.8872799217 | -1.8252066008 | 6.1315710267  |

|     |               |               |               |
|-----|---------------|---------------|---------------|
| C23 | 0.2348468465  | -1.1484036252 | 5.5369102443  |
| C24 | -5.8807987674 | -2.4511256144 | 6.0785539980  |
| C25 | -6.9063439604 | -2.0289729036 | 5.2917405799  |
| S26 | -6.3692095403 | -1.3029867172 | 3.8052689431  |
| C27 | -0.7781355530 | -2.4011572438 | 7.4173774250  |
| C28 | -1.7966872295 | -3.3437668249 | 7.8416026920  |
| C29 | -3.0476999831 | -3.3796504275 | 7.1564254669  |
| C30 | 2.4362025854  | 0.1506132411  | 4.3018116600  |
| C31 | 2.4832891127  | -0.2135368965 | 5.6572002072  |
| C32 | 1.4280867226  | -0.9281359497 | 6.2910237409  |
| C33 | 1.4308439946  | -1.3517688003 | 7.6486441636  |
| C34 | 0.3610048436  | -2.0586435126 | 8.2219163522  |
| C35 | -3.9741980664 | -4.3939548009 | 7.5018785851  |
| C36 | -3.7097947180 | -5.3141050837 | 8.4974337821  |
| C37 | -2.4797704754 | -5.2794415659 | 9.1690409740  |
| C38 | -1.5412863812 | -4.3246199767 | 8.8308496222  |
| S39 | 3.9404465030  | 0.3897897169  | 6.4335074382  |
| C40 | 4.4227156887  | 1.1876200230  | 4.9611498665  |
| C41 | 3.5548859168  | 0.9783845352  | 3.9367616551  |
| S42 | 2.6965138221  | -1.0283605640 | 8.8237540280  |
| C43 | 1.7486594256  | -1.7708733490 | 10.0825179759 |
| C44 | 0.5619040155  | -2.2581628481 | 9.6338118737  |
| C45 | -4.8578330618 | 1.9217319016  | -0.6690670801 |
| H46 | -2.1054249864 | 1.4204002156  | -0.1129674974 |
| H47 | -0.9125207274 | -0.2248182987 | -0.5628373563 |

|     |               |               |               |
|-----|---------------|---------------|---------------|
| H48 | 1.1627231699  | -0.1099939780 | -1.8446589977 |
| H49 | 3.3598551271  | -0.1120858454 | -0.6566412018 |
| H50 | 3.4223853462  | -0.2190411004 | 1.7826187644  |
| H51 | 3.6784523773  | 1.4546535318  | 2.9754359549  |
| C52 | 5.6116121048  | 2.0933711847  | 4.9535698259  |
| C53 | -8.3686458167 | -2.0562755242 | 5.5955217147  |
| H54 | -6.0508494110 | -2.8663547572 | 7.0601043137  |
| H55 | -4.8786630078 | -4.5079732484 | 6.9217663485  |
| H56 | -4.4340369730 | -6.0917194316 | 8.7197865460  |
| H57 | -2.2411934162 | -6.0296510404 | 9.9166733378  |
| H58 | -0.5599506694 | -4.3844736207 | 9.2793254382  |
| H59 | -0.1647648026 | -2.6910230255 | 10.3045201192 |
| C60 | 2.2350387133  | -1.7494088887 | 11.4959864828 |
| F61 | 6.6669825456  | 1.5364544900  | 5.5873172096  |
| F62 | 5.9864386013  | 2.3848237589  | 3.6915592273  |
| F63 | 5.3542376418  | 3.2633761422  | 5.5799960242  |
| F64 | 3.5033762868  | -2.2065878234 | 11.5932631621 |
| F65 | 2.2325430946  | -0.4998457139 | 12.0107484370 |
| F66 | 1.4553295220  | -2.5164227114 | 12.2846080071 |
| F67 | -8.6131510718 | -2.7027358514 | 6.7514000010  |
| F68 | -8.8776162038 | -0.8085356086 | 5.7049975183  |
| F69 | -9.0681374765 | -2.6727803152 | 4.6161069890  |
| F70 | -3.9673704479 | 2.5637722635  | -1.4508468846 |
| F71 | -5.6629554040 | 1.1906033056  | -1.4716010084 |
| F72 | -5.6414302982 | 2.8544879882  | -0.0827916203 |





### Tetrathienyl DBTTC (model for 1g-UD)

6-31G\*\*:

final total energy (Hartree): -5334.05427

HOMO energy (Hartree): -0.18377 (-5.00187 eV)

LUMO energy (Hartree): -0.07442 (-2.02557 eV)

6-311G\*\*:

final total energy (Hartree): -5334.66873 HOMO energy (Hartree): -0.19209 (-5.22832 eV)

LUMO energy (Hartree): -0.08369 (-2.27788 eV)

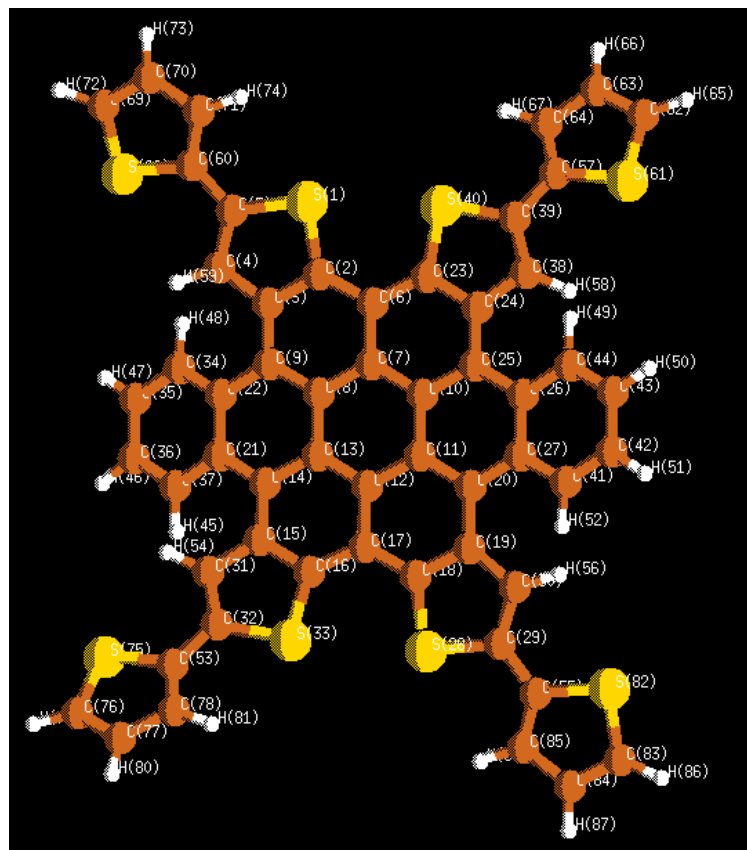

final geometry:

|      | angstroms     |               |              |
|------|---------------|---------------|--------------|
| atom | x             | y             | z            |
| S1   | 0.0719469480  | -0.1196574294 | 0.0186826999 |
| C2   | -0.0095338615 | -0.0405709343 | 1.7777739437 |
| C3   | 1.2749909020  | 0.0417137828  | 2.3307327559 |
| C4   | 2.2993609443  | -0.0462864411 | 1.3377534144 |
| C5   | 1.8356909449  | -0.1370318665 | 0.0554921428 |
| C6   | -1.1724261391 | -0.1226835599 | 2.5934685584 |
| C7   | -0.9789326494 | -0.3358049945 | 3.9971355032 |
| C8   | 0.3336526848  | -0.2174423438 | 4.5617607232 |
| C9   | 1.4363458701  | 0.1202697291  | 3.7485513484 |
| C10  | -2.0950129835 | -0.6578085352 | 4.8472510343 |
| C11  | -1.8834148527 | -0.9314739314 | 6.2564395311 |
| C12  | -0.5535972913 | -0.8726933670 | 6.8040149668 |
| C13  | 0.5427066790  | -0.4788750273 | 5.9659928460 |
| C14  | 1.8464315298  | -0.3804740001 | 6.4938408742 |
| C15  | 2.0995309322  | -0.9669367248 | 7.7707724491 |
| C16  | 1.0327442210  | -1.3339978085 | 8.6017118407 |
| C17  | -0.3206655016 | -1.1967533878 | 8.1811148194 |
| C18  | -1.4643457271 | -1.3292772815 | 9.0133456488 |
| C19  | -2.7725593145 | -1.2763918852 | 8.5080999169 |
| C20  | -2.9866567836 | -1.2391873841 | 7.0865753333 |
| C21  | 2.8673792981  | 0.3288605365  | 5.7516978646 |
| C22  | 2.6638787269  | 0.5755533443  | 4.3666021494 |

|     |               |               |               |
|-----|---------------|---------------|---------------|
| C23 | -2.5111310786 | 0.0098409945  | 2.1402746688  |
| C24 | -3.6108476041 | -0.1924610790 | 2.9864508908  |
| C25 | -3.4047667033 | -0.6969944493 | 4.3165159728  |
| C26 | -4.4707467774 | -1.2969941592 | 5.0945793953  |
| C27 | -4.2613150456 | -1.5712331192 | 6.4780879256  |
| S28 | -1.4628787982 | -1.4366909036 | 10.7691114132 |
| C29 | -3.2177539850 | -1.2975327408 | 10.8228115724 |
| C30 | -3.7431240894 | -1.2138756998 | 9.5620412889  |
| C31 | 3.3660793459  | -1.3320180593 | 8.3180356628  |
| C32 | 3.3023854857  | -1.9072899289 | 9.5548171556  |
| S33 | 1.6304288580  | -2.0341447722 | 10.1081182038 |
| C34 | 3.6065808206  | 1.3766900310  | 3.6770984834  |
| C35 | 4.7244715087  | 1.8848874026  | 4.3079306326  |
| C36 | 4.9225605350  | 1.6454418826  | 5.6758822484  |
| C37 | 3.9995801332  | 0.9002268991  | 6.3821074473  |
| C38 | -4.8372859227 | 0.2095652526  | 2.3636731191  |
| C39 | -4.7047859919 | 0.6262704054  | 1.0674866677  |
| S40 | -3.0219464124 | 0.5631935243  | 0.5509062243  |
| C41 | -5.2676388797 | -2.2818913600 | 7.1807719318  |
| C42 | -6.4486049780 | -2.6662713969 | 6.5791332844  |
| C43 | -6.6542778800 | -2.3966345481 | 5.2187541947  |
| C44 | -5.6736421084 | -1.7498075533 | 4.4950889255  |
| H45 | 4.1126969484  | 0.8099792669  | 7.4534350210  |
| H46 | 5.7716646883  | 2.0831549110  | 6.1921650653  |
| H47 | 5.4193485127  | 2.5089813562  | 3.7540788570  |

|     |               |               |               |
|-----|---------------|---------------|---------------|
| H48 | 3.4158422980  | 1.6566905589  | 2.6505588987  |
| H49 | -5.8027625628 | -1.6558572358 | 3.4273592555  |
| H50 | -7.5552853067 | -2.7409993040 | 4.7196997675  |
| H51 | -7.1886240930 | -3.2215013608 | 7.1479509714  |
| H52 | -5.0825817561 | -2.5996920969 | 8.1957925066  |
| C53 | 4.4338259255  | -2.3744320977 | 10.3290189517 |
| H54 | 4.2966926145  | -1.2484646987 | 7.7764205838  |
| C55 | -3.9264348697 | -1.2742358220 | 12.0863849388 |
| H56 | -4.7956126949 | -1.0329967313 | 9.3998638492  |
| C57 | -5.7530425343 | 1.0753321431  | 0.1741056276  |
| H58 | -5.7839553323 | 0.2661776968  | 2.8806321728  |
| H59 | 3.3514728393  | -0.1233292658 | 1.5702714763  |
| C60 | 2.6349174556  | -0.2538296871 | -1.1470043063 |
| S61 | -7.4275530183 | 0.6445387511  | 0.4904108938  |
| C62 | -7.9698363914 | 1.5171608097  | -0.9058744912 |
| C63 | -6.9271340270 | 2.0882660423  | -1.5810420961 |
| C64 | -5.6664634642 | 1.8376242727  | -0.9695588319 |
| H65 | -9.0240915920 | 1.5522705318  | -1.1421559739 |
| H66 | -7.0527586345 | 2.6764210155  | -2.4825318843 |
| H67 | -4.7260487710 | 2.2229900862  | -1.3468300487 |
| S68 | 4.3350346910  | 0.1966614648  | -1.1138476614 |
| C69 | 4.5410694844  | -0.2625894612 | -2.7726850873 |
| C70 | 3.3731214052  | -0.7146923220 | -3.3209838958 |
| C71 | 2.2884566501  | -0.7088992184 | -2.3990247847 |
| H72 | 5.5104751212  | -0.1665428490 | -3.2409564559 |

|     |               |               |               |
|-----|---------------|---------------|---------------|
| H73 | 3.2876180880  | -1.0499144398 | -4.3480461801 |
| H74 | 1.2896450446  | -1.0517544623 | -2.6426020075 |
| S75 | 6.0385862839  | -1.7534209782 | 9.9600256597  |
| C76 | 6.7640530260  | -2.7748057276 | 11.1571766730 |
| C77 | 5.8295304591  | -3.5269127877 | 11.8131795860 |
| C78 | 4.5036393221  | -3.2995683479 | 11.3450401038 |
| H79 | 7.8344314705  | -2.7534204870 | 11.3061798792 |
| H80 | 6.0769549541  | -4.2294427139 | 12.6004122041 |
| H81 | 3.6316353646  | -3.8201089553 | 11.7247906509 |
| S82 | -5.6480908192 | -1.6228482225 | 12.1507905036 |
| C83 | -5.6851927261 | -1.3833708918 | 13.8675806511 |
| C84 | -4.4490042619 | -1.0707809534 | 14.3609356769 |
| C85 | -3.4486908176 | -1.0087015055 | 13.3507794338 |
| H86 | -6.6168985076 | -1.4903873682 | 14.4050553221 |
| H87 | -4.2568578144 | -0.8830573610 | 15.4108346943 |
| H88 | -2.4120697379 | -0.7573494786 | 13.5445220330 |

### Tetrathienyl DBTTC (model for 1g-BF)

6-31G\*\*:

final total energy (Hartree): -5334.05561

HOMO energy (Hartree): -0.18257 (-4.96921 eV)

LUMO energy (Hartree): -0.07315 (-1.991 eV)

6-311G\*\*:

final total energy (Hartree): -5334.66995

HOMO energy (Hartree): -0.19098 (-5.19811 eV)

LUMO energy (Hartree): -0.08235 (-2.24141 eV)

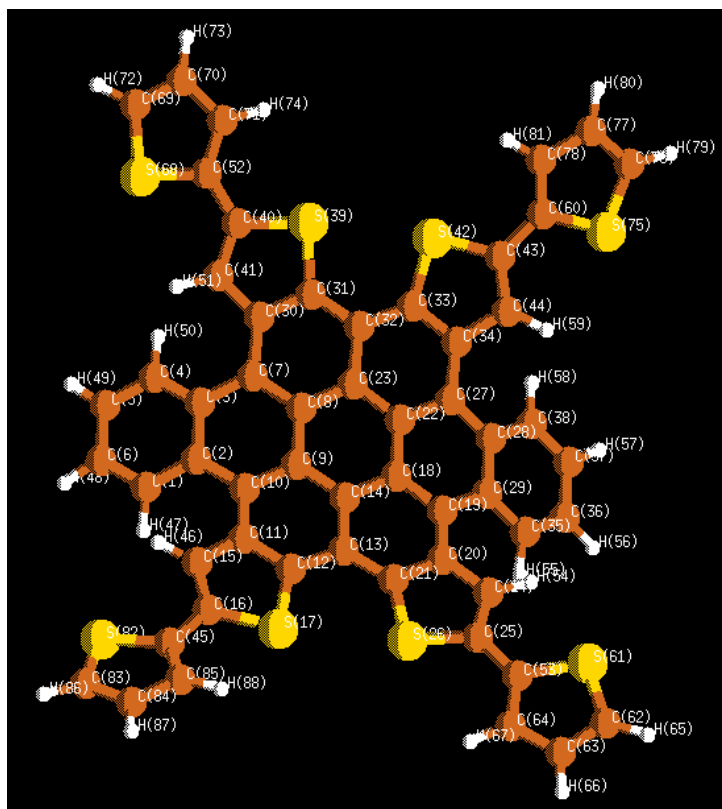

final geometry:

|      | angstroms     |               |               |
|------|---------------|---------------|---------------|
| atom | x             | y             | z             |
| C1   | 0.0412276663  | -0.1990529200 | -0.0321122413 |
| C2   | 0.0137450136  | -0.1120713312 | 1.3812935994  |
| C3   | 1.2556170056  | -0.0583902182 | 2.0786240303  |
| C4   | 2.4553883238  | -0.0930459738 | 1.3276480247  |
| C5   | 2.4484172886  | -0.1383018437 | -0.0523044046 |
| C6   | 1.2278792583  | -0.1924447479 | -0.7394915530 |
| C7   | 1.2557080673  | -0.1182170934 | 3.5269465716  |
| C8   | 0.1109716370  | -0.6196336855 | 4.1811665380  |
| C9   | -1.1534783954 | -0.6604189721 | 3.4771882875  |
| C10  | -1.2197000550 | -0.2146532093 | 2.1410902519  |
| C11  | -2.5109135583 | 0.0715558458  | 1.5910000991  |
| C12  | -3.6762479889 | -0.2853118355 | 2.2935568816  |
| C13  | -3.6313727741 | -0.9341547660 | 3.5596556459  |
| C14  | -2.3376212590 | -1.0994821770 | 4.1571597895  |
| C15  | -2.8092182816 | 0.8019774406  | 0.3958971231  |
| C16  | -4.1434248185 | 0.9664361548  | 0.1483125604  |
| S17  | -5.1170427475 | 0.2069400066  | 1.4064297762  |
| C18  | -2.1902872306 | -1.7702571398 | 5.4166894538  |
| C19  | -3.2930524135 | -2.4080603277 | 6.0142331773  |
| C20  | -4.5950310695 | -2.0931801606 | 5.5179204647  |
| C21  | -4.7521297841 | -1.3806967346 | 4.3183485651  |



|     |               |               |               |
|-----|---------------|---------------|---------------|
| C22 | -0.9244597824 | -1.7495347252 | 6.1149194470  |
| C23 | 0.1858536493  | -1.0413501051 | 5.5496070833  |
| C24 | -5.8404999827 | -2.3429467321 | 6.1662652026  |
| C25 | -6.9376975520 | -1.8862403105 | 5.4938102885  |
| S26 | -6.4646967506 | -1.1003157085 | 3.9853538740  |
| C27 | -0.8101600081 | -2.3768298662 | 7.3745541284  |
| C28 | -1.8103868297 | -3.3549280799 | 7.7586084110  |
| C29 | -3.0608968220 | -3.3676418063 | 7.0771209248  |
| C30 | 2.3806920895  | 0.2597119997  | 4.3295072888  |
| C31 | 2.4242294664  | -0.1004943014 | 5.6862265286  |
| C32 | 1.3759001956  | -0.8269674888 | 6.3146178832  |
| C33 | 1.3819125113  | -1.3048386407 | 7.6541590223  |
| C34 | 0.3199118344  | -2.0516178750 | 8.1923382681  |
| C35 | -3.9834992211 | -4.4000439578 | 7.3765511631  |
| C36 | -3.7144518200 | -5.3597709423 | 8.3323518955  |
| C37 | -2.4811729576 | -5.3507697328 | 8.9990888133  |
| C38 | -1.5445369289 | -4.3813014667 | 8.6976881195  |
| S39 | 3.8810706200  | 0.5157323106  | 6.4544968352  |
| C40 | 4.3959523228  | 1.2978944326  | 4.9643073321  |
| C41 | 3.5021412485  | 1.0676567793  | 3.9558411401  |
| S42 | 2.6417981372  | -1.0489552740 | 8.8546426721  |
| C43 | 1.6934205539  | -1.8615752877 | 10.0946125490 |
| C44 | 0.5104013644  | -2.3220198421 | 9.5868431419  |
| C45 | -4.7417241333 | 1.6769522584  | -0.9650508638 |
| H46 | -2.0589835490 | 1.2747432880  | -0.2207758976 |

|     |                |               |               |
|-----|----------------|---------------|---------------|
| H47 | -0.8833079187  | -0.3457390643 | -0.5724988134 |
| H48 | 1.2109821887   | -0.2778691496 | -1.8218253477 |
| H49 | 3.3873122612   | -0.1813948035 | -0.5959679985 |
| H50 | 3.4021384483   | -0.1589390577 | 1.8447486176  |
| H51 | 3.6179532680   | 1.5154010865  | 2.9799322518  |
| C52 | 5.6077799197   | 2.0880186564  | 4.9216456519  |
| C53 | -8.3102734118  | -1.9913850941 | 5.9458061842  |
| H54 | -5.9211222083  | -2.7972884887 | 7.1420826075  |
| H55 | -4.8889099627  | -4.4891192523 | 6.7933318680  |
| H56 | -4.4375842081  | -6.1463014399 | 8.5257109227  |
| H57 | -2.2386231301  | -6.1310097334 | 9.7142087215  |
| H58 | -0.5612345310  | -4.4529675417 | 9.1414444458  |
| H59 | -0.2404333191  | -2.7714253232 | 10.2205807015 |
| C60 | 2.1822862396   | -1.9754712425 | 11.4528916804 |
| S61 | -8.6390206793  | -2.5607209595 | 7.5810831285  |
| C62 | -10.3502732962 | -2.4446642444 | 7.3318155687  |
| C63 | -10.6495086049 | -1.9912646107 | 6.0783149129  |
| C64 | -9.4918526739  | -1.7325283849 | 5.2895877964  |
| H65 | -11.0280500649 | -2.7128262268 | 8.1296976588  |
| H66 | -11.6629930006 | -1.8459829182 | 5.7232689867  |
| H67 | -9.5298208189  | -1.3790970516 | 4.2656609030  |
| S68 | 5.9694037951   | 3.0991861521  | 3.5302509938  |
| C69 | 7.4605596611   | 3.6299944591  | 4.2395233013  |
| C70 | 7.6628209804   | 3.0704051913  | 5.4699095999  |
| C71 | 6.6110498606   | 2.1941967960  | 5.8589845052  |

|     |               |               |               |
|-----|---------------|---------------|---------------|
| H72 | 8.0919487371  | 4.3250733655  | 3.7042377502  |
| H73 | 8.5349517259  | 3.2730223505  | 6.0805931340  |
| H74 | 6.5997970284  | 1.6489769827  | 6.7960375687  |
| S75 | 1.5263507613  | -3.1950980482 | 12.5344022988 |
| C76 | 2.5461448512  | -2.6658985670 | 13.8326586535 |
| C77 | 3.3518275553  | -1.6292644393 | 13.4517442508 |
| C78 | 3.1470307222  | -1.2364234568 | 12.0996319300 |
| H79 | 2.4879595532  | -3.1539886109 | 14.7952879049 |
| H80 | 4.0638894797  | -1.1530572511 | 14.1155557489 |
| H81 | 3.6767873453  | -0.4198071186 | 11.6235448026 |
| S82 | -3.8291254178 | 1.9123389719  | -2.4499367880 |
| C83 | -5.1197143478 | 2.8260446475  | -3.1594406480 |
| C84 | -6.1909086142 | 2.9256621826  | -2.3159552894 |
| C85 | -5.9788098717 | 2.2720253822  | -1.0692019543 |
| H86 | -5.0085224959 | 3.2296129534  | -4.1559650713 |
| H87 | -7.1006980762 | 3.4568528531  | -2.5698729382 |
| H88 | -6.7017705911 | 2.2641390167  | -0.2614768532 |

### DBTTC tetramethyl tetrasulfone (model for 1h-UD)

6-31G\*\*

final total energy (Hartree): -3885.46340

HOMO energy (Hartree): -0.22077 (6.01 eV)

LUMO energy (Hartree): -0.11825 (3.22 eV)

basis: 6-311G\*\*

final total energy (Hartree): -3886.04293

HOMO energy (Hartree): -0.23115 (6.29 eV)

LUMO energy (Hartree): -0.12940 (3.52 eV)

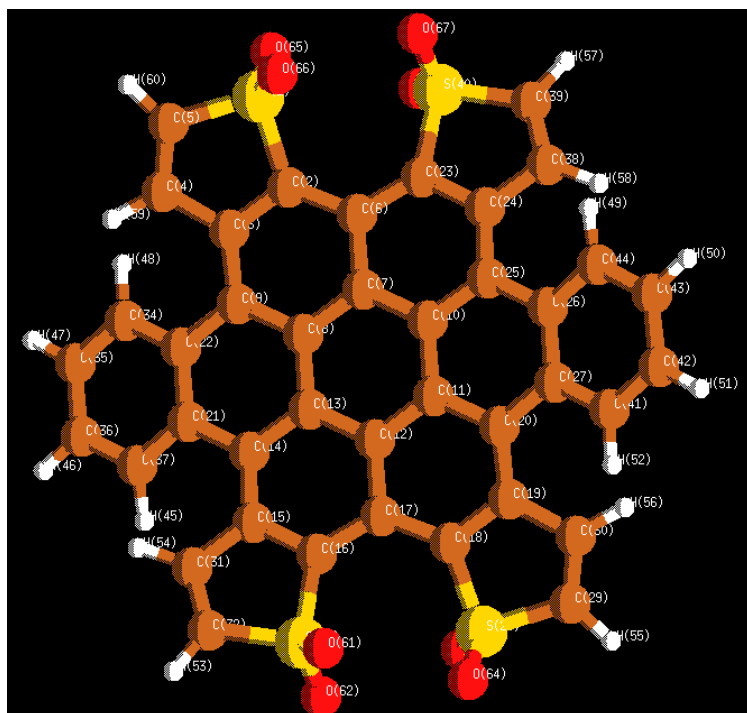

final geometry:

|      | angstroms     |               |               |
|------|---------------|---------------|---------------|
| atom | x             | y             | z             |
| C1   | 0.0000000000  | 0.0000000000  | 0.0000000000  |
| C2   | 0.0000000000  | 0.0000000000  | 1.4148707688  |
| C3   | 1.2474389605  | 0.0000000000  | 2.0994734490  |
| C4   | 2.4377180093  | -0.0003714832 | 1.3343238337  |
| C5   | 2.4081864511  | -0.0471357946 | -0.0465769600 |
| C6   | 1.1781634881  | -0.0466870546 | -0.7203056503 |
| C7   | 1.2619807870  | 0.1492439635  | 3.5430882969  |
| C8   | 0.1071681398  | 0.6367180457  | 4.1992817746  |
| C9   | -1.1603748013 | 0.6366110785  | 3.5025342701  |
| C10  | -1.2244591344 | 0.1471275274  | 2.1771968527  |
| C11  | -2.5147291028 | -0.1626419684 | 1.6540112454  |
| C12  | -3.6533307412 | 0.3385441872  | 2.2607003872  |
| C13  | -3.6097981057 | 1.0797895958  | 3.4692332931  |
| C14  | -2.3446218939 | 1.0872755428  | 4.1633558928  |
| C15  | -2.2695822400 | 1.5433562967  | 5.5155910683  |
| C16  | -3.4250736698 | 2.0329941538  | 6.1694519446  |
| C17  | -4.5628465982 | 2.3264332786  | 5.3604182271  |
| C18  | -4.6594565429 | 1.8132589119  | 4.0784702542  |
| C19  | -5.6502352951 | 3.2632687914  | 5.7136601704  |
| C20  | -6.5723003935 | 3.4672412970  | 4.7676386268  |
| S21  | -6.1868306933 | 2.4665404471  | 3.3212382421  |

|     |               |               |               |
|-----|---------------|---------------|---------------|
| C22 | 0.1814375782  | 1.0858345675  | 5.5538262800  |
| C23 | -1.0021741810 | 1.5402644494  | 6.2139548327  |
| C24 | -0.9379284901 | 2.0230651903  | 7.5422434224  |
| C25 | -2.1655657453 | 2.1761592437  | 8.3011056826  |
| C26 | -3.4116999799 | 2.1853422292  | 7.6128336999  |
| C27 | 2.3967759407  | -0.1547257867 | 4.3515267329  |
| C28 | 2.4915508083  | 0.3437386897  | 5.6393247357  |
| C29 | 1.4444660932  | 1.0782947433  | 6.2520295047  |
| C30 | 1.4894653720  | 1.8050757790  | 7.4689469882  |
| C31 | 0.3533244990  | 2.3126140161  | 8.0750728806  |
| S32 | 2.9441884731  | 2.4568040034  | 8.3594487301  |
| C33 | 1.9252099319  | 3.4465531360  | 9.4654647280  |
| C34 | 0.6334972120  | 3.2422825357  | 9.1895375272  |
| C35 | 3.4775827538  | -1.0966524653 | 3.9922314555  |
| C36 | 4.3914464756  | -1.3216470395 | 4.9412348779  |
| S37 | 4.0074528515  | -0.3349100514 | 6.3974214537  |
| C38 | -4.6044756805 | 2.1927913099  | 8.3745171636  |
| C39 | -4.5800741404 | 2.2376391286  | 9.7553930946  |
| C40 | -3.3524163188 | 2.2259116000  | 10.4330501847 |
| C41 | -2.1722069121 | 2.1714117170  | 9.7164484663  |
| C42 | -2.7886554779 | -1.1139217526 | 0.5561296654  |
| C43 | -4.0797766003 | -1.3428481156 | 0.2958921465  |
| S44 | -5.1050938620 | -0.3478520509 | 1.3923320422  |
| O45 | -7.2205183270 | 1.4377859389  | 3.1700887158  |
| O46 | -5.8455833285 | 3.3627610130  | 2.2085400847  |

|     |               |               |               |
|-----|---------------|---------------|---------------|
| O47 | 3.6492540891  | -1.2412791399 | 7.4964775697  |
| O48 | 5.0516130147  | 0.6801518407  | 6.5677580199  |
| O49 | 3.6990252574  | 3.3611255894  | 7.4817640219  |
| O50 | 3.6279944080  | 1.4252292906  | 9.1454330761  |
| O51 | -5.8092311849 | 0.6600979961  | 0.5936668969  |
| O52 | -5.8409953441 | -1.2475590706 | 2.2905946475  |
| H53 | -1.2405820317 | 2.0522514402  | 10.2540735439 |
| H54 | -3.3266800731 | 2.2075786232  | 11.5182033016 |
| H55 | -5.5121866904 | 2.2289778018  | 10.3118680581 |
| H56 | -5.5580533955 | 2.0893431945  | 7.8744208625  |
| H57 | -0.9356466253 | 0.1085665282  | -0.5332429160 |
| H58 | 1.1487858799  | -0.0317708869 | -1.8053868650 |
| H59 | 3.3380612124  | -0.0326112672 | -0.6066086908 |
| H60 | 3.3922523447  | 0.1087358099  | 1.8316546721  |
| C61 | 2.6052485875  | 4.3227941206  | 10.4581577695 |
| H62 | -0.1607151606 | 3.7740376319  | 9.6962270063  |
| C63 | 5.5783477553  | -2.2186783883 | 4.9891501801  |
| H64 | 3.4786731017  | -1.6223208723 | 3.0467153722  |
| C65 | -4.7575238229 | -2.2482328327 | -0.6720844237 |
| H66 | -1.9893755089 | -1.6436553239 | 0.0539372952  |
| H67 | -5.6514472100 | 3.8006785506  | 6.6525947477  |
| C68 | -7.7697562092 | 4.3502333020  | 4.7170713546  |
| H69 | 3.2275097919  | 3.7235959745  | 11.1326129591 |
| H70 | 3.2667251537  | 5.0334703543  | 9.9501662473  |
| H71 | 1.8732963425  | 4.8781892504  | 11.0499026197 |

|     |               |               |               |
|-----|---------------|---------------|---------------|
| H72 | 5.6818758779  | -2.7744252032 | 4.0538665263  |
| H73 | 6.4906143105  | -1.6359364197 | 5.1604166278  |
| H74 | 5.4855151444  | -2.9292625468 | 5.8181372047  |
| H75 | -5.3899367225 | -1.6708876474 | -1.3561436793 |
| H76 | -4.0244509476 | -2.8107650181 | -1.2555447720 |
| H77 | -5.4091508714 | -2.9526316576 | -0.1429258829 |
| H78 | -7.8729536405 | 4.9167750881  | 5.6459233119  |
| H79 | -7.6919952743 | 5.0510592783  | 3.8782983044  |
| H80 | -8.6764551730 | 3.7546689710  | 4.5606345686  |



### DBTTC tetramethyl tetrasulfone (model for 1h-BF)

6-31G\*\*

final total energy (Hartree): -3885.45577

HOMO energy (Hartree): -0.21959 (5.97 eV)

LUMO energy (Hartree): -0.11907 (3.24 eV)

6-311G\*\*

final total energy (Hartree): -3886.03433

HOMO energy (Hartree): -0.22989 ( 6.26 eV)

LUMO energy (Hartree): -0.13023 (3.54 eV)

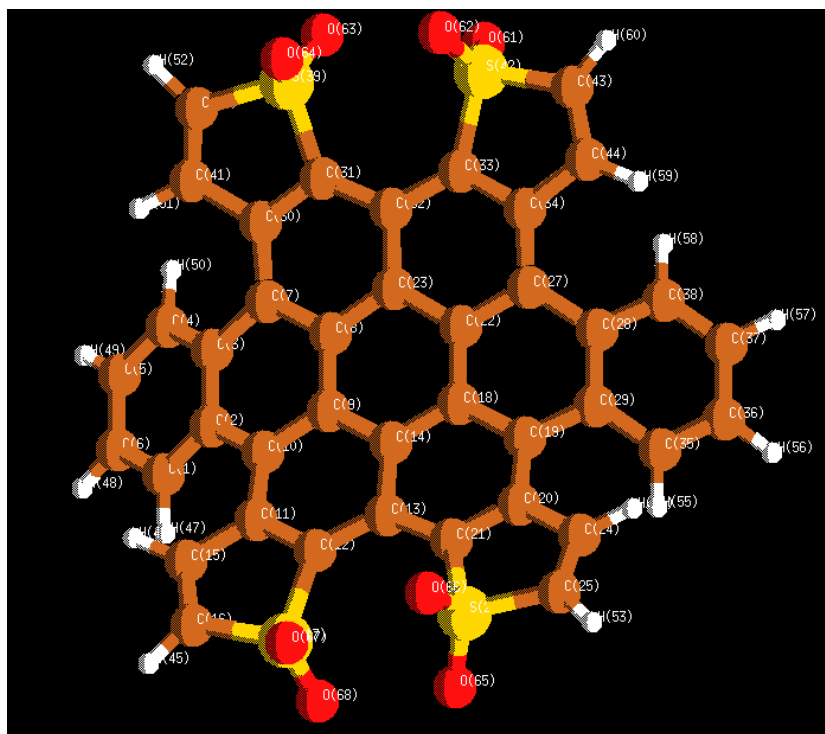

final geometry:

| angstroms |               |               |               |
|-----------|---------------|---------------|---------------|
| atom      | x             | y             | z             |
| C1        | 0.0000000000  | 0.0000000000  | 0.0000000000  |
| C2        | 0.0000000000  | 0.0000000000  | 1.4145487658  |
| C3        | 1.2499215831  | 0.0000000000  | 2.0965947715  |
| C4        | 2.4370112921  | -0.0049746084 | 1.3281064595  |
| C5        | 2.4067274359  | 0.0419957907  | -0.0534697932 |
| C6        | 1.1770024696  | 0.0458603074  | -0.7240000984 |
| C7        | 1.2642104365  | -0.1631193549 | 3.5435833899  |
| C8        | 0.1325863731  | -0.7397206442 | 4.1641588274  |
| C9        | -1.1358634052 | -0.7573222006 | 3.4657207913  |
| C10       | -1.2242279019 | -0.1785322272 | 2.1812806106  |
| C11       | -2.5214562600 | 0.1208256005  | 1.6829356942  |
| C12       | -3.6628420518 | -0.3628842387 | 2.3113809329  |
| C13       | -3.6146259644 | -1.1130915433 | 3.5168780000  |
| C14       | -2.3003352090 | -1.2925815311 | 4.0950486071  |
| C15       | -2.7973769271 | 1.0054609004  | 0.5319191493  |
| C16       | -4.0772956387 | 1.1031041648  | 0.1652295832  |
| S17       | -5.0862247499 | 0.0736774834  | 1.2381227934  |
| C18       | -2.1204429794 | -2.0737170407 | 5.2761598475  |
| C19       | -3.1917620459 | -2.8263513255 | 5.8049252117  |
| C20       | -4.5021314905 | -2.4955300826 | 5.3568680278  |
| C21       | -4.6953449309 | -1.6555017301 | 4.2686496530  |
| C22       | -0.8599348231 | -2.0420777572 | 5.9813402455  |

|     |               |               |               |
|-----|---------------|---------------|---------------|
| C23 | 0.2191394548  | -1.2430777608 | 5.4959869138  |
| C24 | -5.7470190652 | -2.8806745014 | 6.0539984220  |
| C25 | -6.8777444236 | -2.3902275994 | 5.5415086358  |
| S26 | -6.4941425564 | -1.3305196364 | 4.1436178637  |
| C27 | -0.7283265616 | -2.7530282106 | 7.1928276094  |
| C28 | -1.6583358756 | -3.8325884455 | 7.4708146513  |
| C29 | -2.8975984923 | -3.8727950665 | 6.7706294230  |
| C30 | 2.3791573126  | 0.1518463636  | 4.3689353800  |
| C31 | 2.4394053341  | -0.2810575694 | 5.6889330916  |
| C32 | 1.3917088047  | -1.0112296882 | 6.3084865338  |
| C33 | 1.3153773136  | -1.4892289480 | 7.6488268758  |
| C34 | 0.3091028622  | -2.3413219419 | 8.0790316756  |
| C35 | -3.7367128065 | -4.9983045121 | 6.9469716131  |
| C36 | -3.3960416908 | -6.0265988124 | 7.8068964676  |
| C37 | -2.1743542117 | -5.9857304825 | 8.4941348392  |
| C38 | -1.3161875902 | -4.9173460844 | 8.3107204150  |
| S39 | 4.1004968726  | 0.1563064745  | 6.3278658349  |
| C40 | 4.5148447646  | 1.0999434950  | 4.8547036622  |
| C41 | 3.5242413734  | 0.9940963648  | 3.9652282138  |
| S42 | 2.2770751796  | -0.9884133118 | 9.1229420247  |
| C43 | 1.2862930632  | -2.0046068575 | 10.2263099486 |
| C44 | 0.3273661509  | -2.6198148176 | 9.5299199667  |
| C45 | -4.7563895959 | 1.9081096256  | -0.8861892369 |
| H46 | -2.0111897130 | 1.5864432231  | 0.0685388289  |
| H47 | -0.9339971113 | -0.1137322890 | -0.5340349217 |

|     |               |               |               |
|-----|---------------|---------------|---------------|
| H48 | 1.1442688360  | 0.0296394919  | -1.8089615561 |
| H49 | 3.3362699584  | 0.0219467588  | -0.6138656109 |
| H50 | 3.3921815901  | -0.1235406374 | 1.8207209314  |
| H51 | 3.5199861681  | 1.5412962575  | 3.0323091177  |
| C52 | 5.7858157745  | 1.8745290673  | 4.8427235460  |
| C53 | -8.2990827653 | -2.5086500812 | 5.9666740491  |
| H54 | -5.7297753508 | -3.4691274138 | 6.9605132614  |
| H55 | -4.6278291485 | -5.0995386254 | 6.3420948307  |
| H56 | -4.0517902355 | -6.8857298963 | 7.9069344524  |
| H57 | -1.8777820060 | -6.8125190441 | 9.1319958616  |
| H58 | -0.3351250357 | -4.9478056462 | 8.7670106542  |
| H59 | -0.4360698853 | -3.2257167315 | 9.9985847959  |
| C60 | 1.6009742060  | -1.9780820816 | 11.6810535697 |
| O61 | 3.6516661936  | -1.4974723329 | 9.0929141868  |
| O62 | 1.9915831276  | 0.4146891607  | 9.4492511675  |
| O63 | 4.9338878932  | -1.0505165092 | 6.3979391580  |
| O64 | 4.0434042026  | 1.1015181459  | 7.4474186023  |
| O65 | -7.0659236342 | -1.8948932370 | 2.9169248988  |
| O66 | -6.7970570757 | 0.0437463972  | 4.5622799076  |
| O67 | -6.0503767518 | 0.9470370237  | 1.9140684799  |
| O68 | -5.5290119336 | -1.1110709163 | 0.4928105185  |
| H69 | -8.3858476424 | -3.1365683596 | 6.8568600022  |
| H70 | -8.7142262381 | -1.5185171017 | 6.1851478211  |
| H71 | -8.9025618524 | -2.9446664291 | 5.1625007597  |
| H72 | -4.0336489011 | 2.5236658552  | -1.4267722060 |

|     |               |               |               |
|-----|---------------|---------------|---------------|
| H73 | -5.2680036505 | 1.2530077196  | -1.6006069256 |
| H74 | -5.5162517907 | 2.5566999725  | -0.4369706111 |
| H75 | 1.5398108172  | -0.9534880120 | 12.0645966287 |
| H76 | 0.9038020150  | -2.6080812101 | 12.2391780056 |
| H77 | 2.6225422726  | -2.3327421860 | 11.8576418825 |
| H78 | 5.8209043904  | 2.5575460471  | 5.6985242370  |
| H79 | 6.6470329187  | 1.2018643097  | 4.9266053459  |
| H80 | 5.8774856175  | 2.4523913974  | 3.9196041702  |

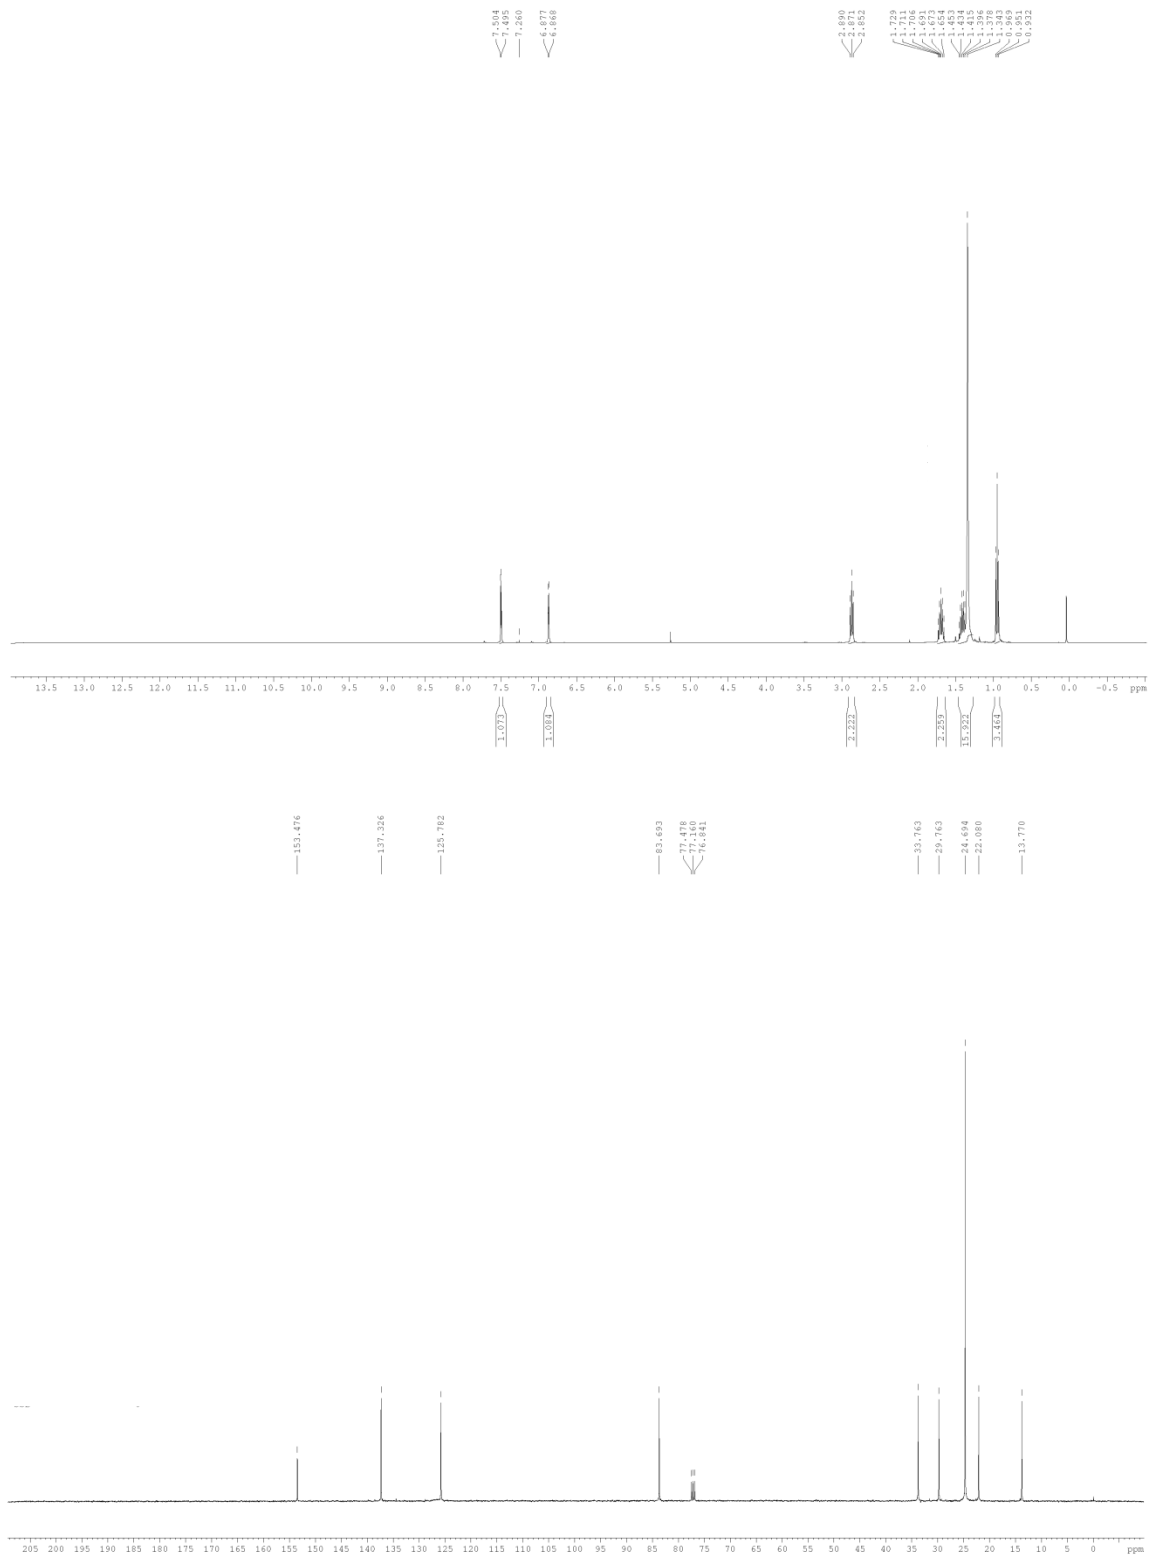

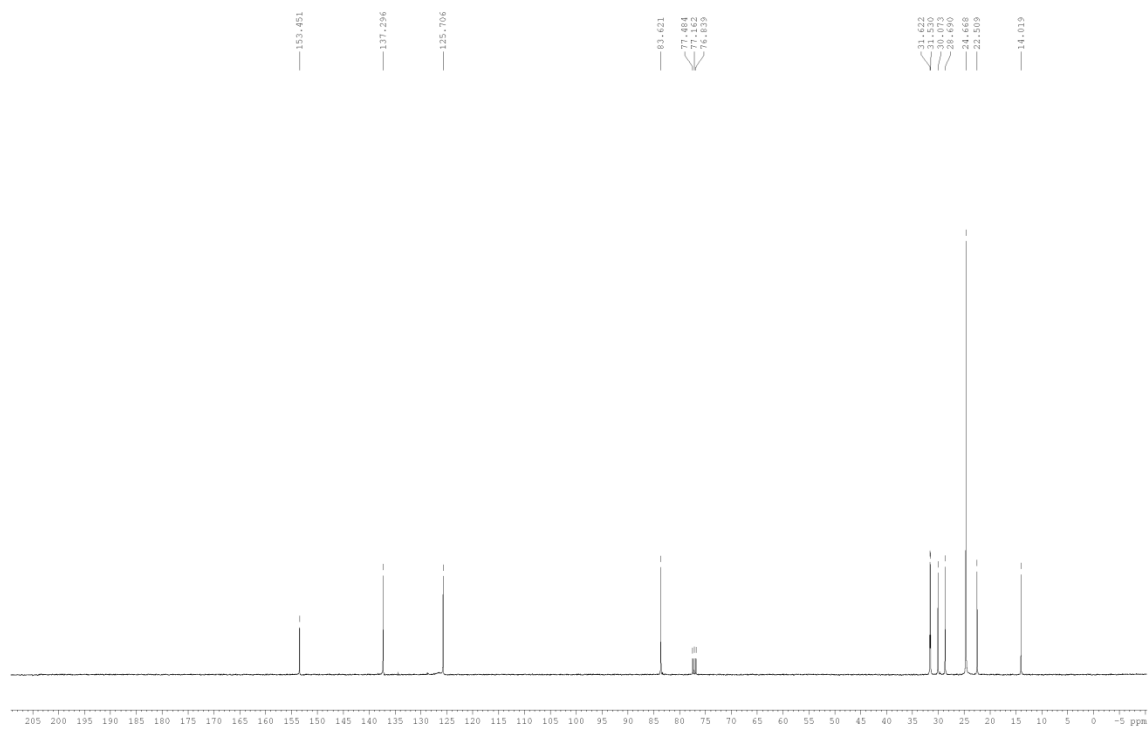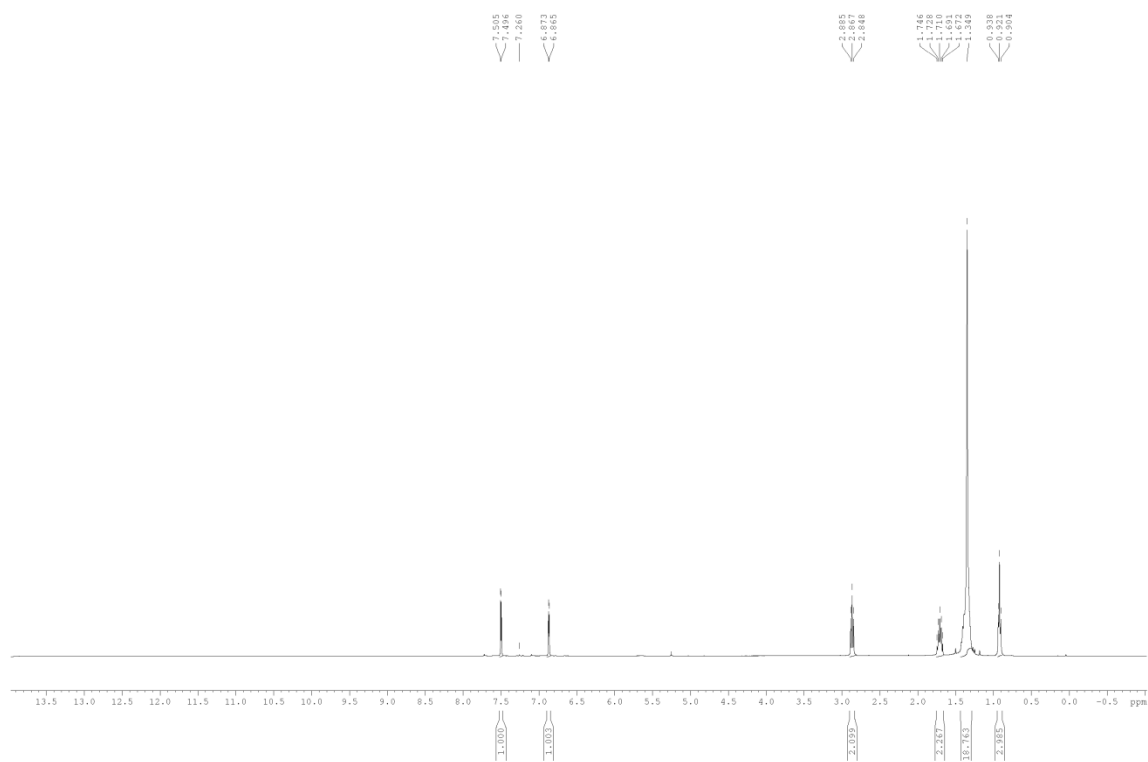

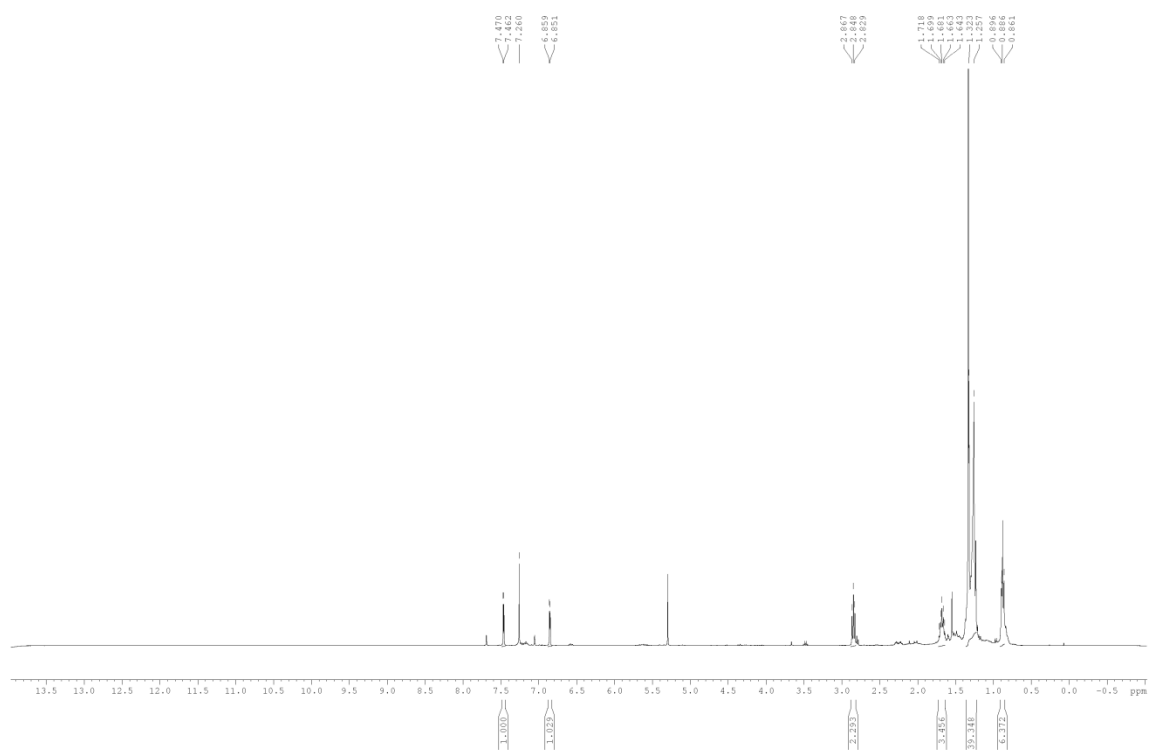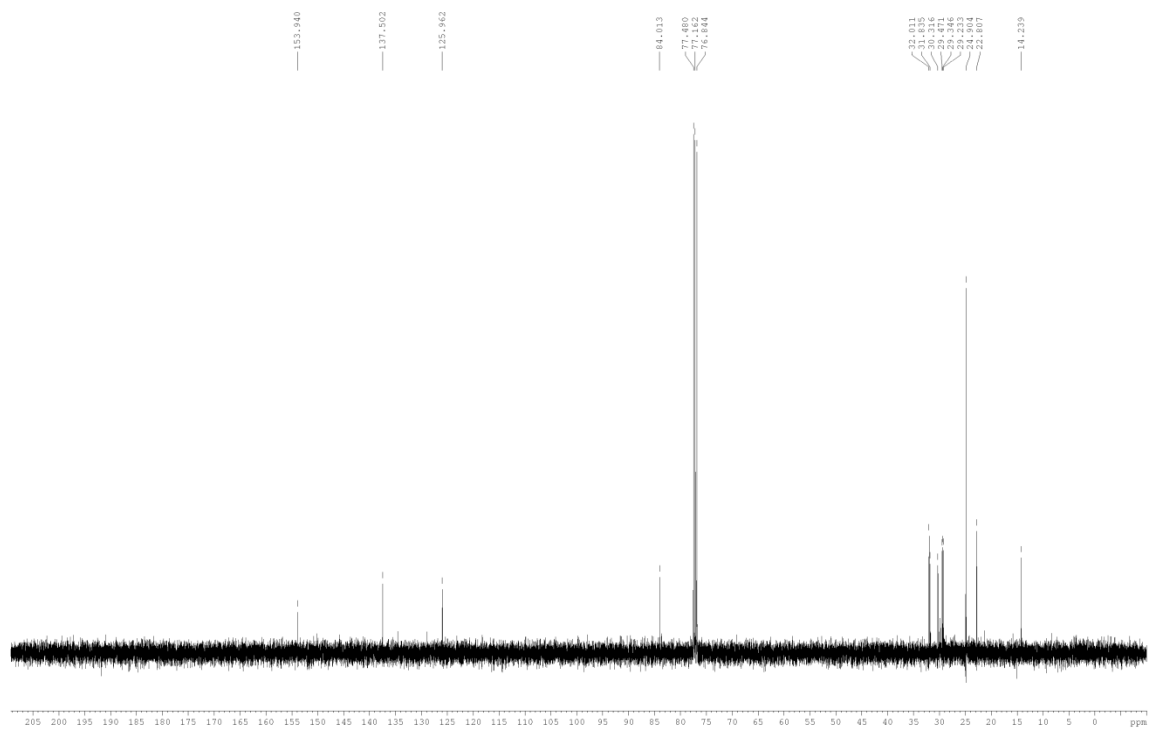



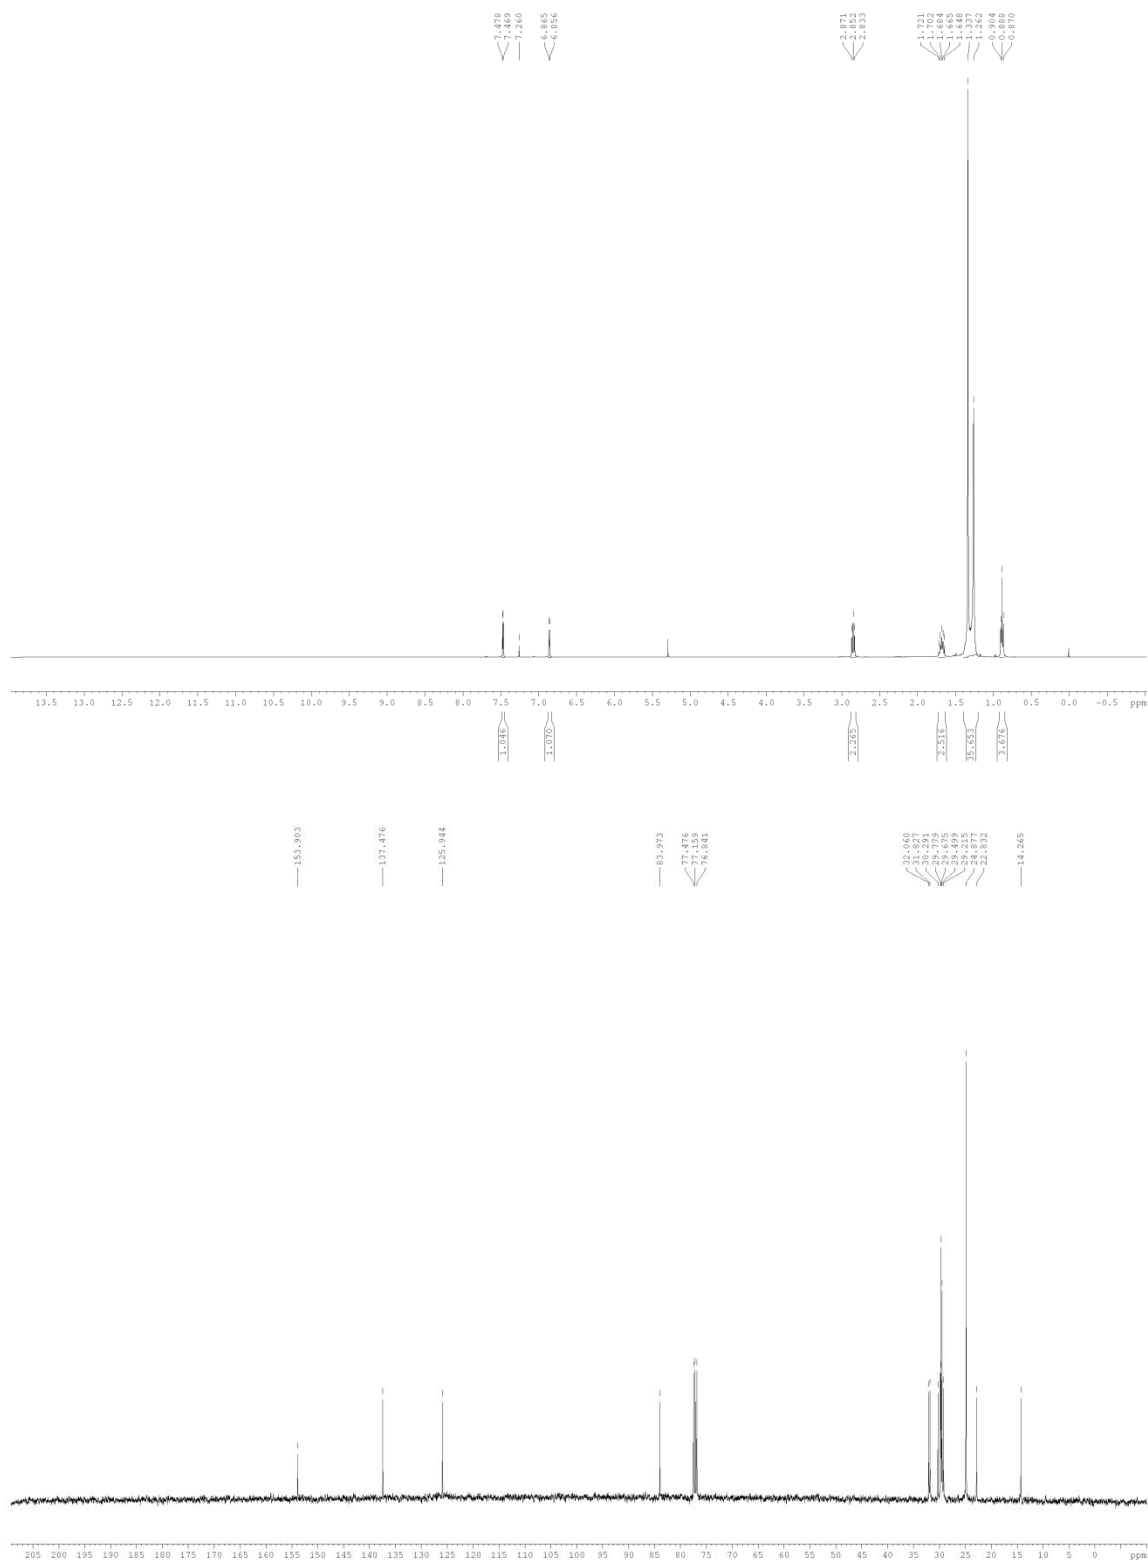

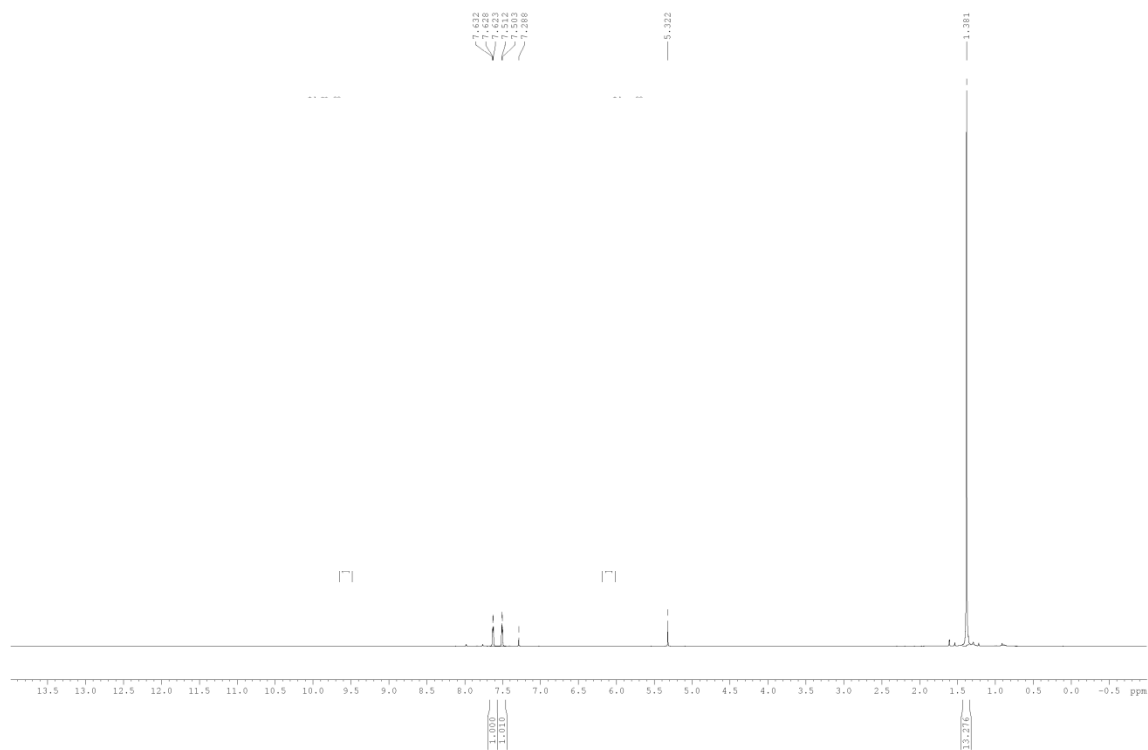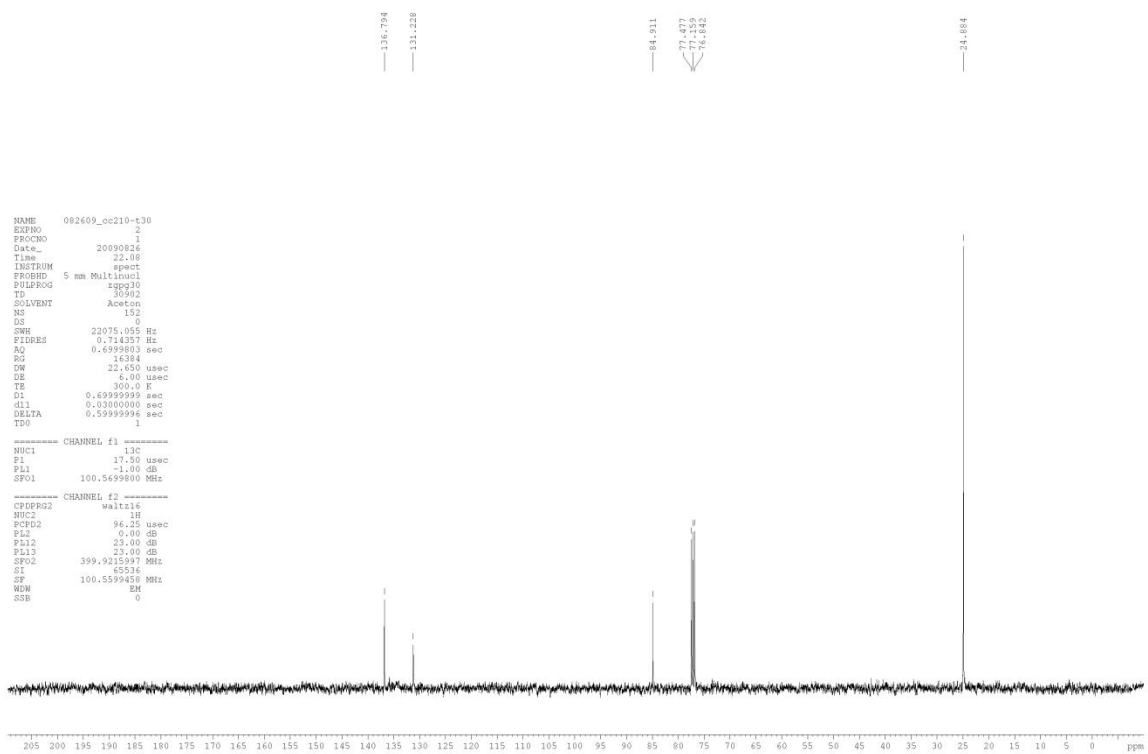

```

NAME      082609_oc210-t30
EXPNO    2
PROCNO    1
Date_    20090826
Time     22.98
INSTRUM   spect
PROBHD    5 mm Miltinnoc1
PULPROG   zgpg30
TD        30902
SOLVENT   Acetone
NS        152
DS        0
SWH       22075.055 Hz
FIDRES    0.714357 Hz
AQ        0.6999813 sec
RG        16384
DM        22.650 usec
DE        6.00 usec
TE        300.2 K
D1        0.69999999 sec
d11       0.03000000 sec
DELTA     0.99999996 sec
TD0       1

===== CHANNEL f1 =====
NUC1      13C
P1        37.50 usec
PL1       -1.00 dB
SFO1     100.5698800 MHz

===== CHANNEL f2 =====
CPDPRG2   waltz16
NUC2      1H
PCPD2     96.25 usec
PL2       0.00 dB
PL12      23.00 dB
PL13      23.00 dB
SFO2     399.925597 MHz
SI        85536
SF        100.5599458 MHz
WDW       EM
SSB       0
    
```



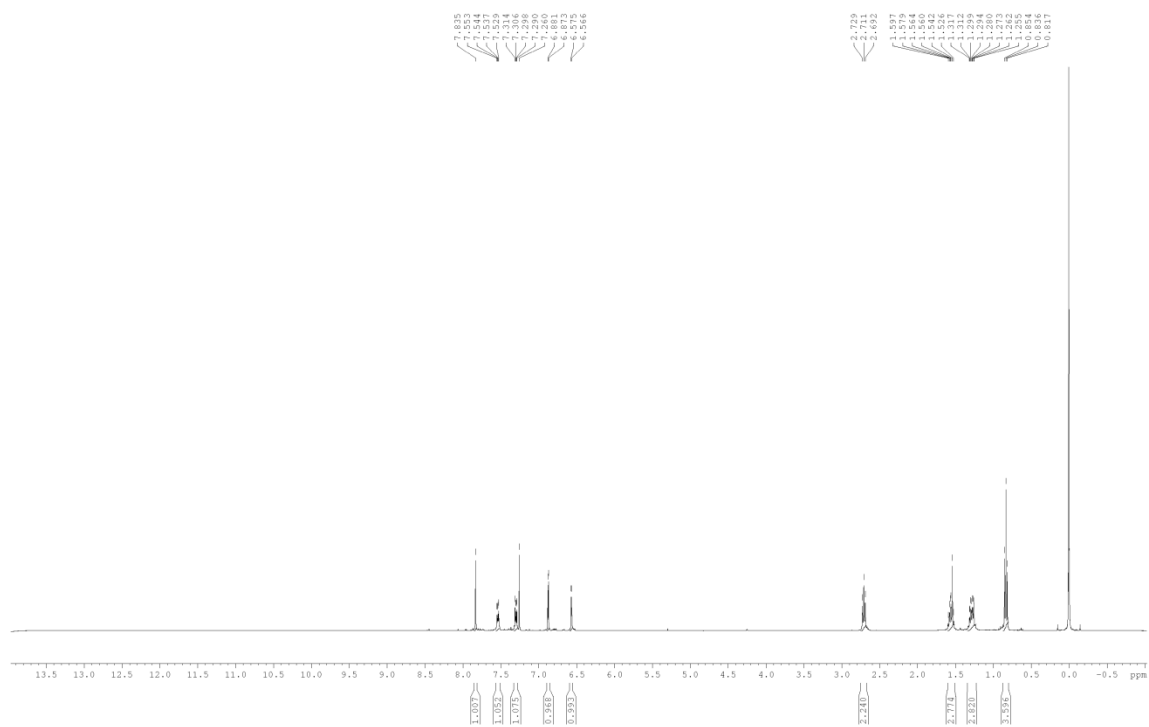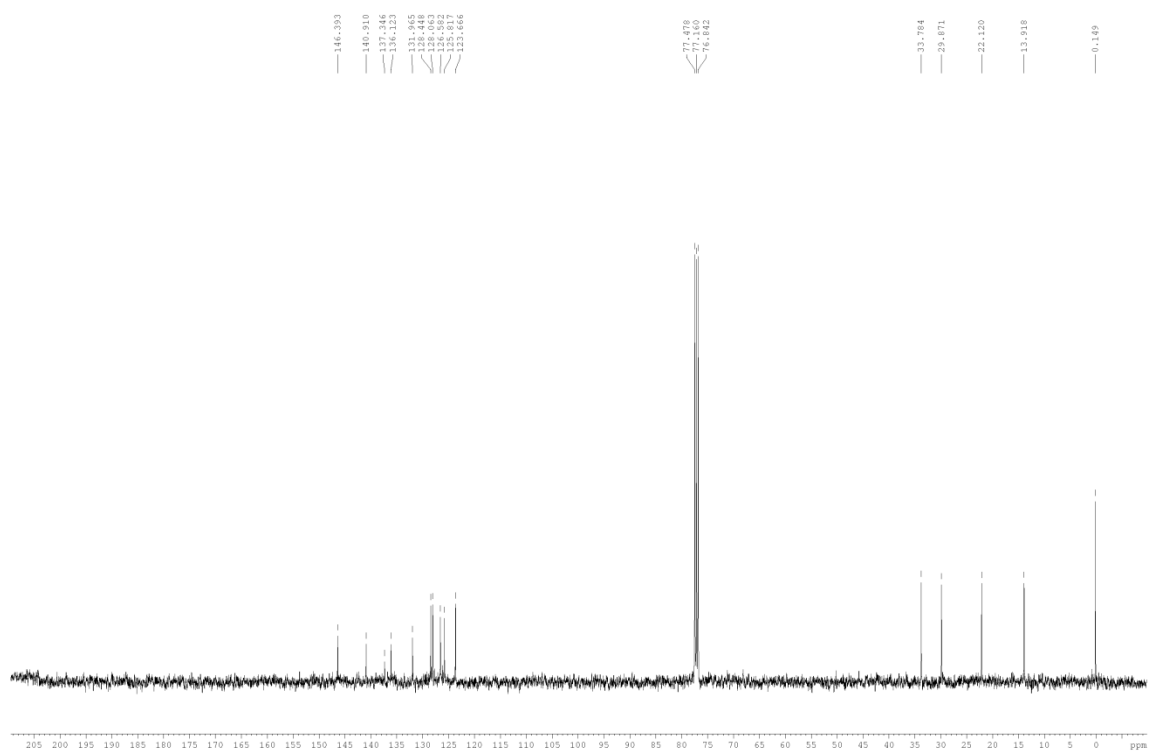

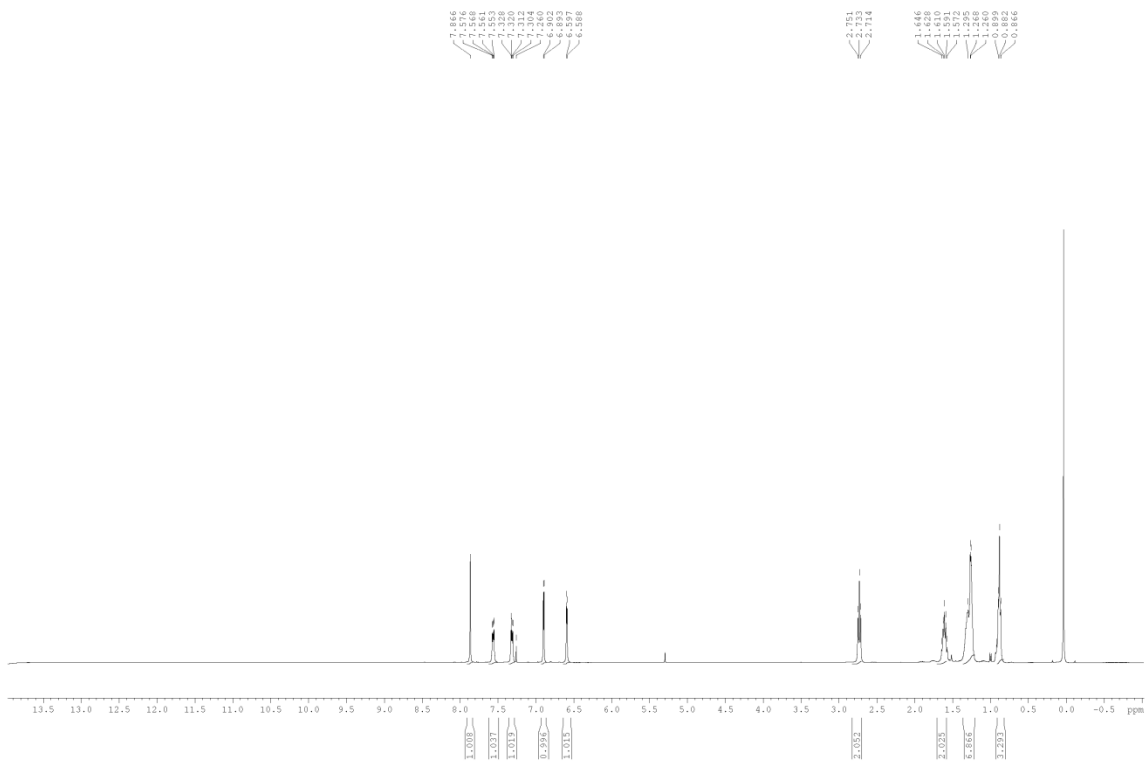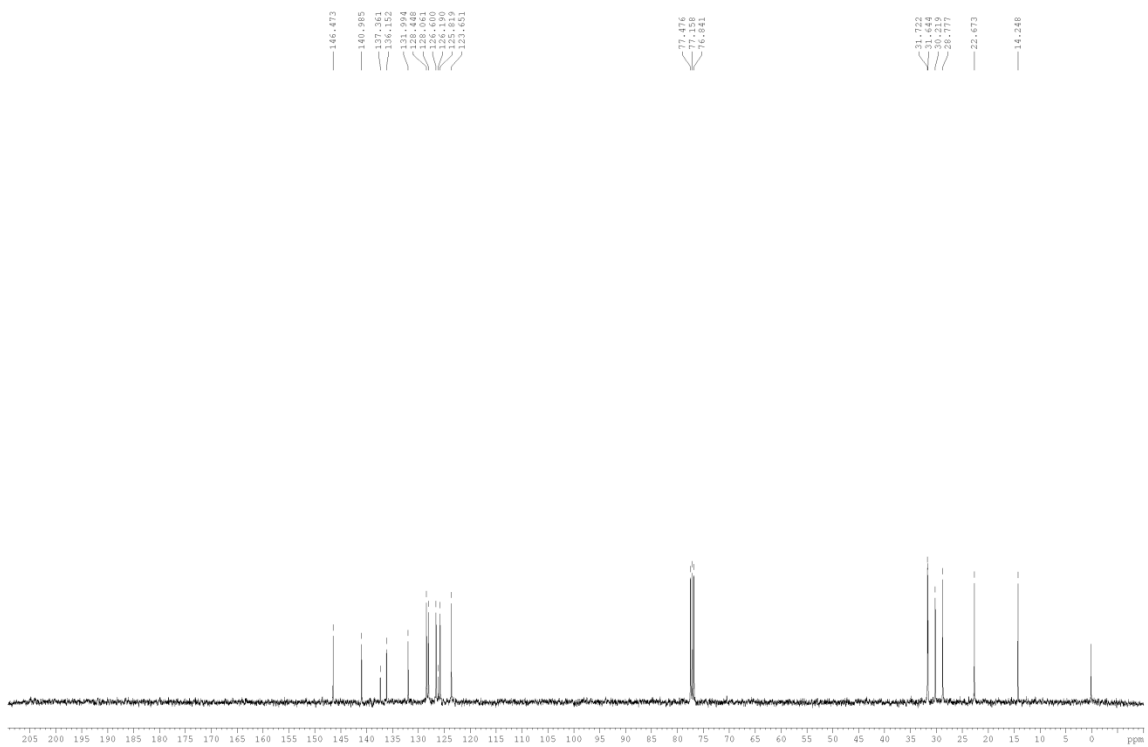











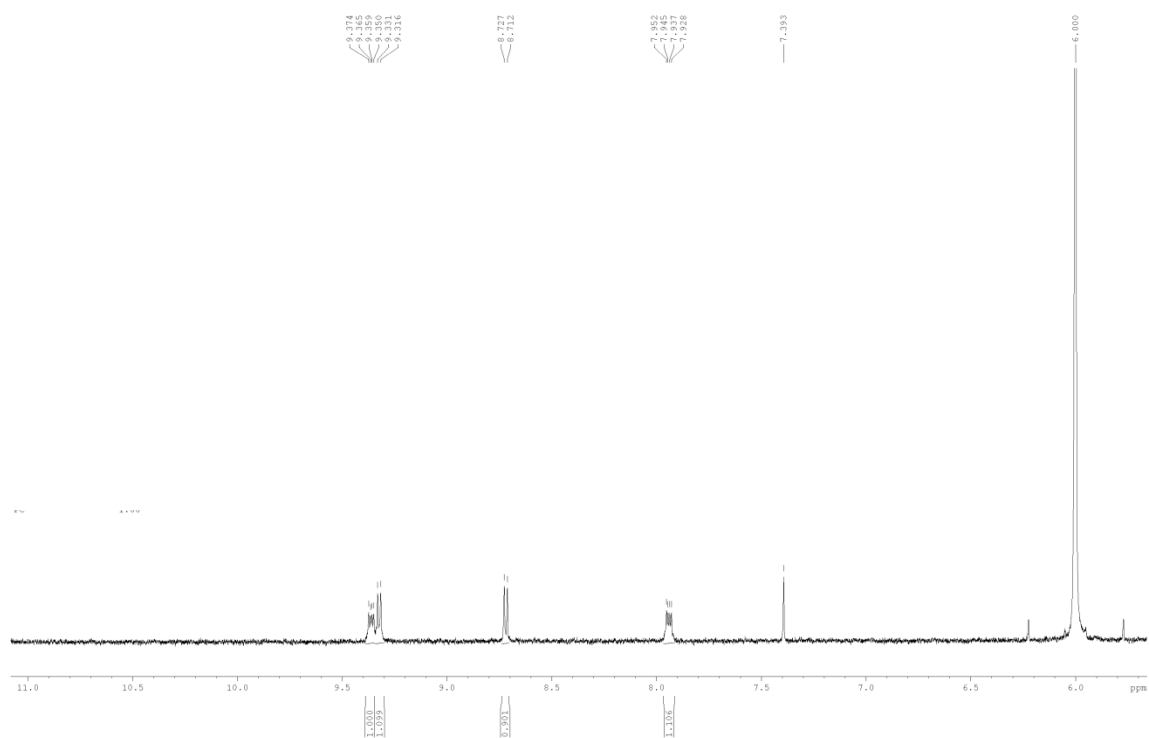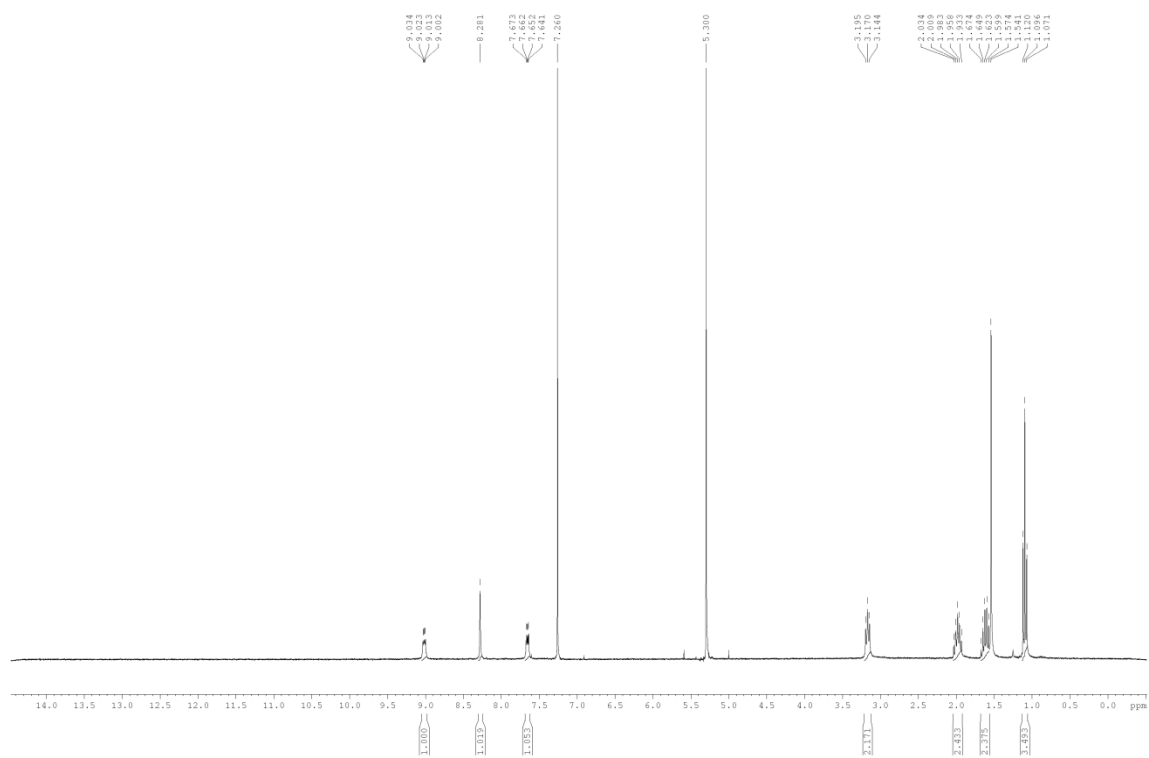

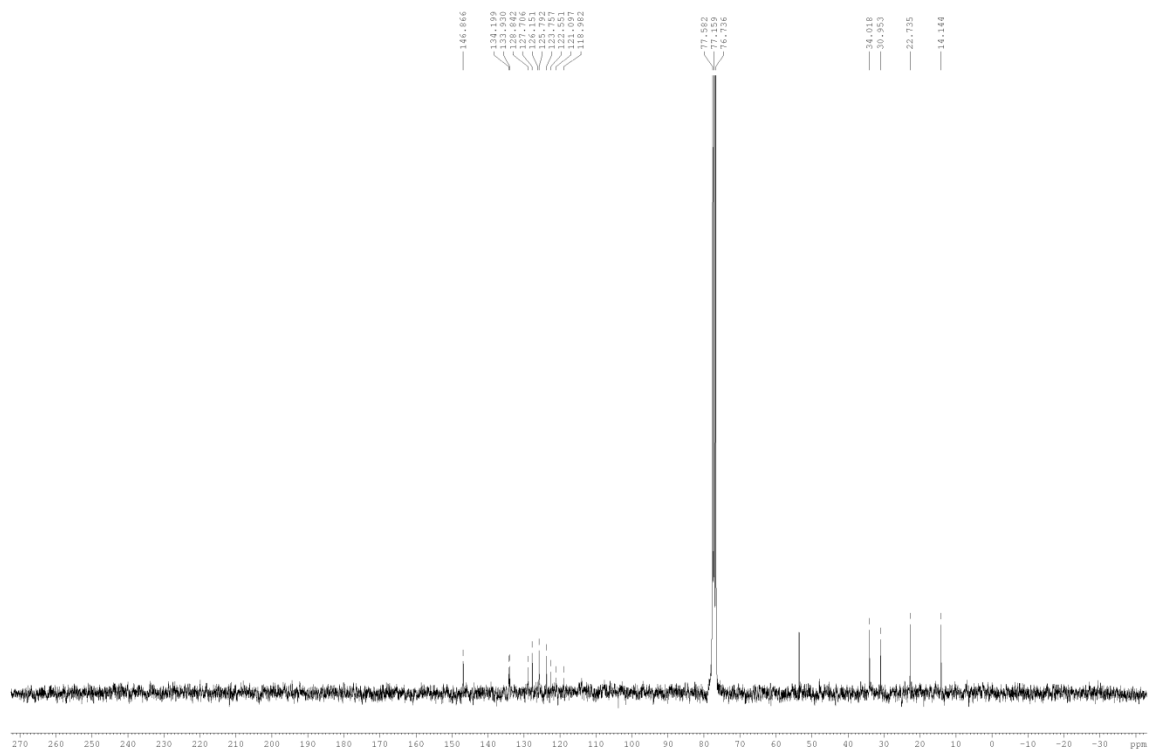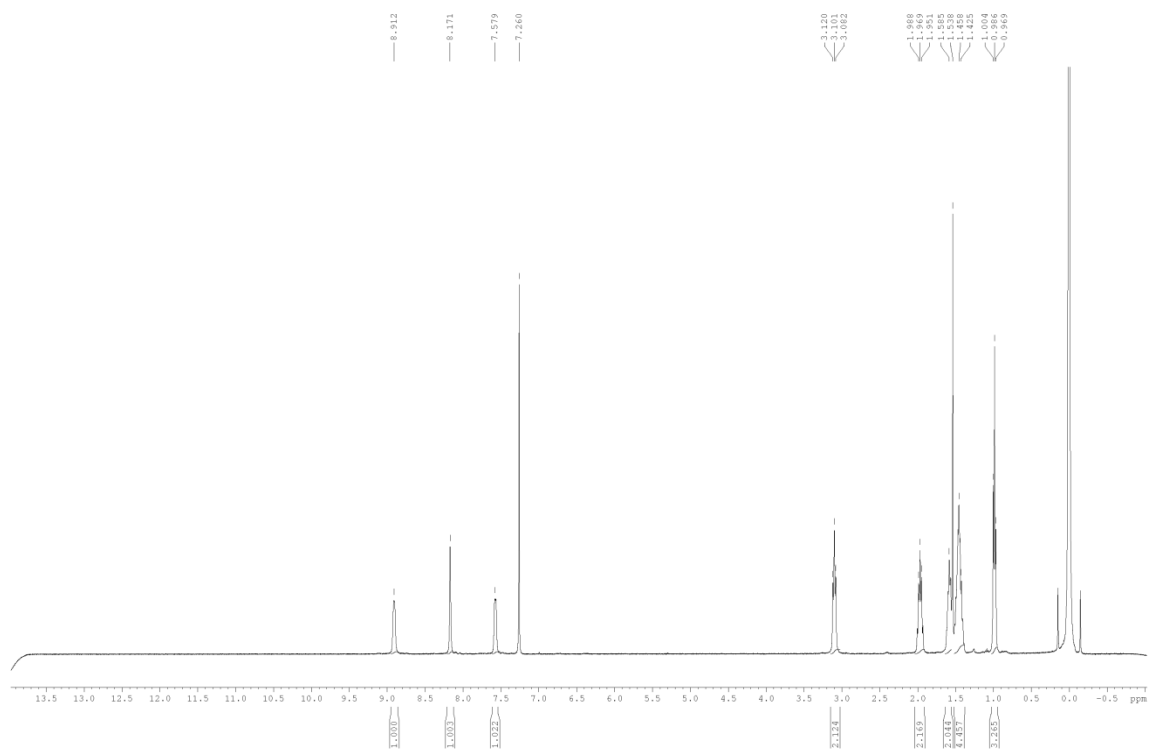

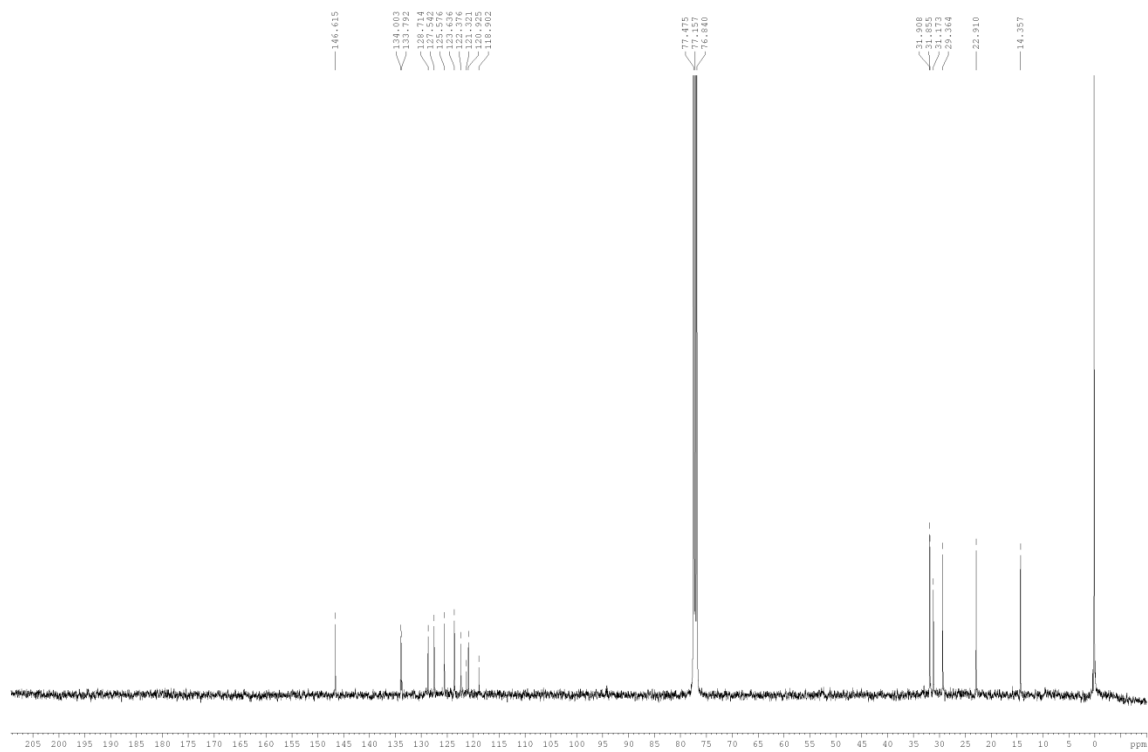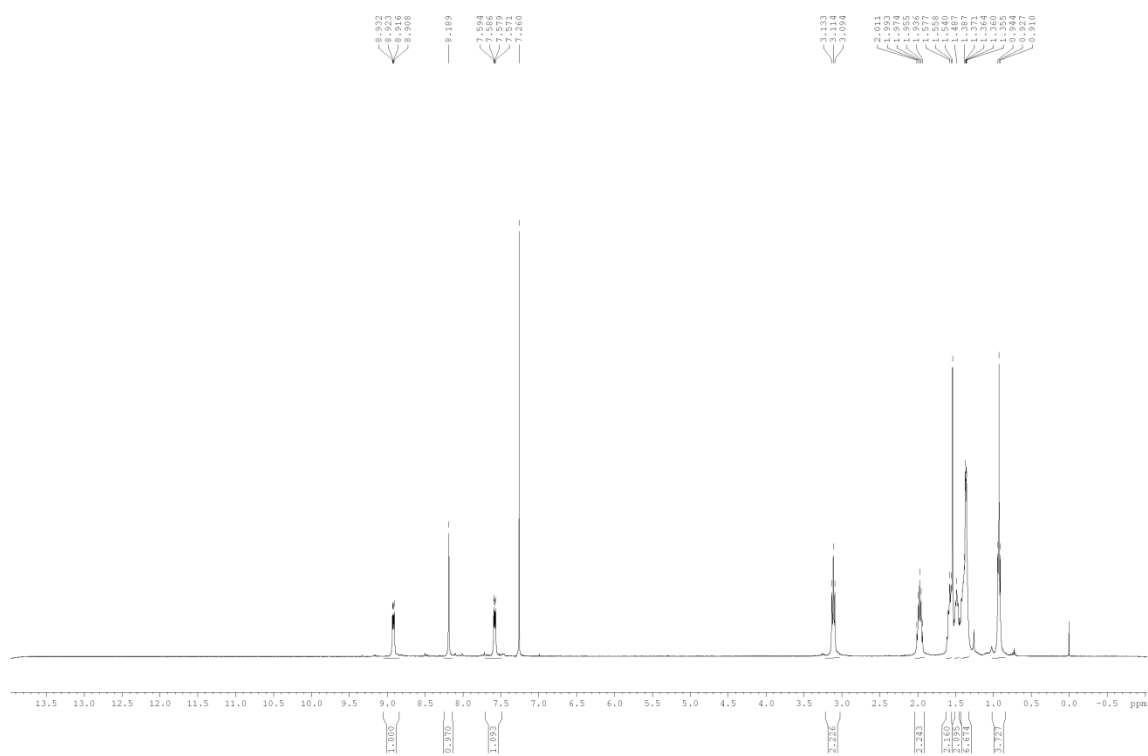

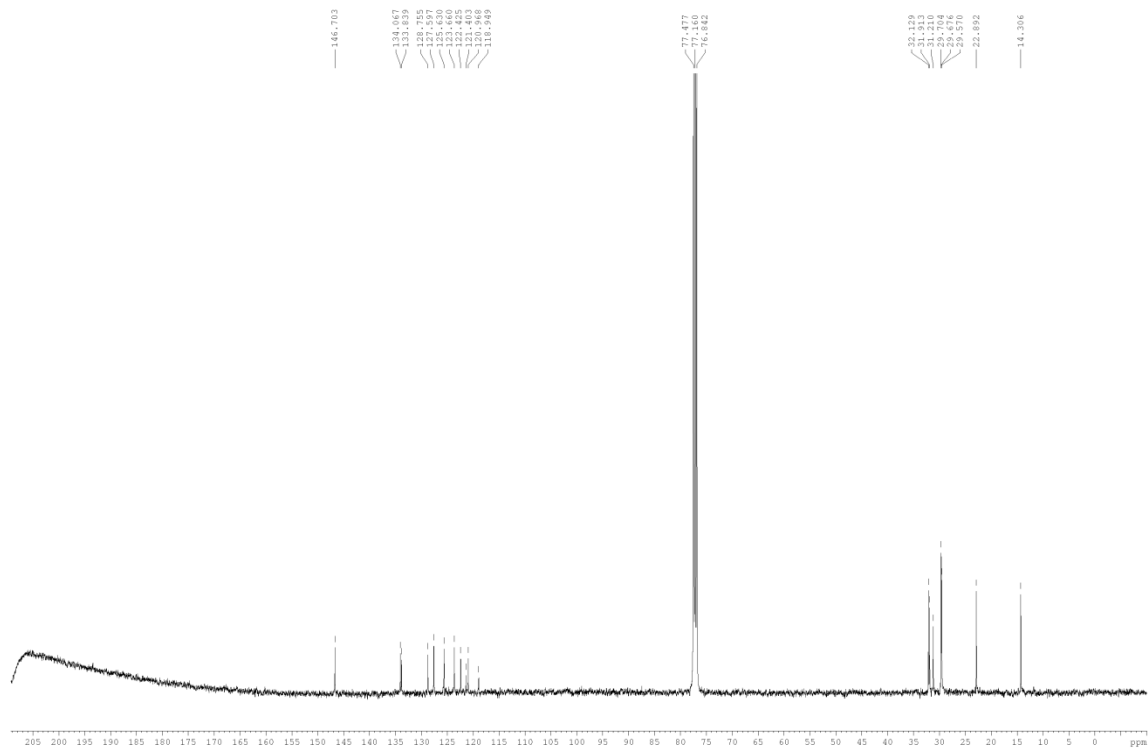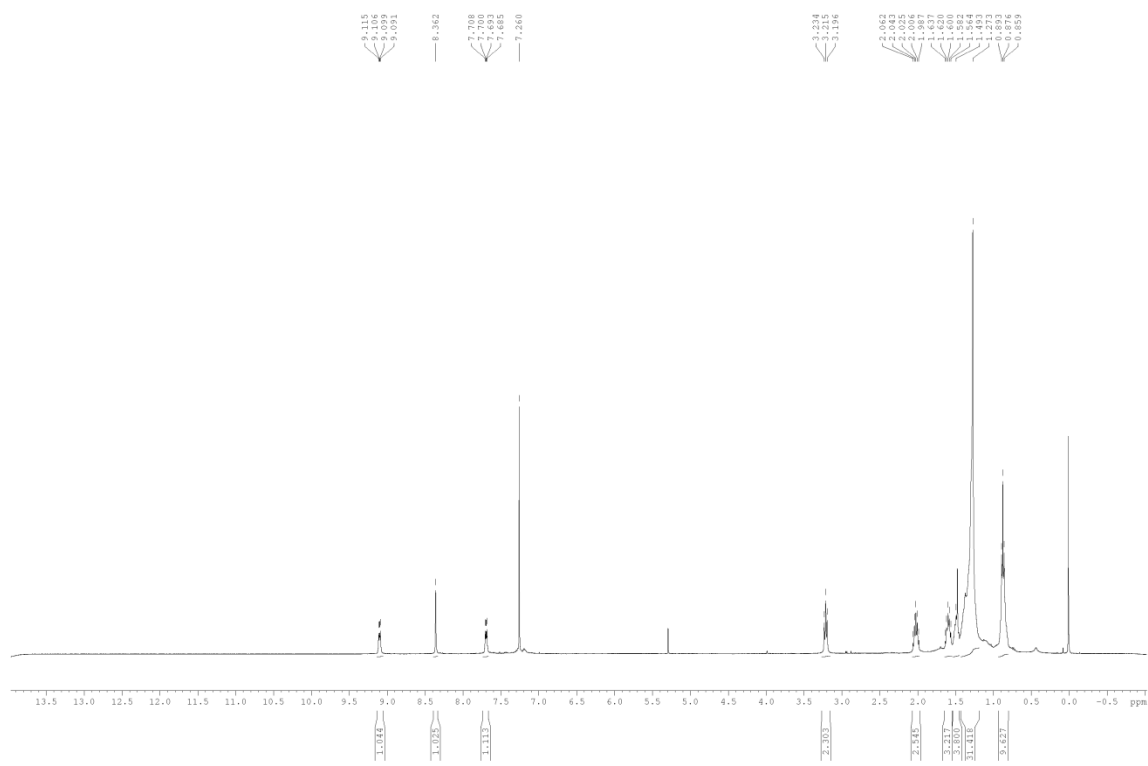

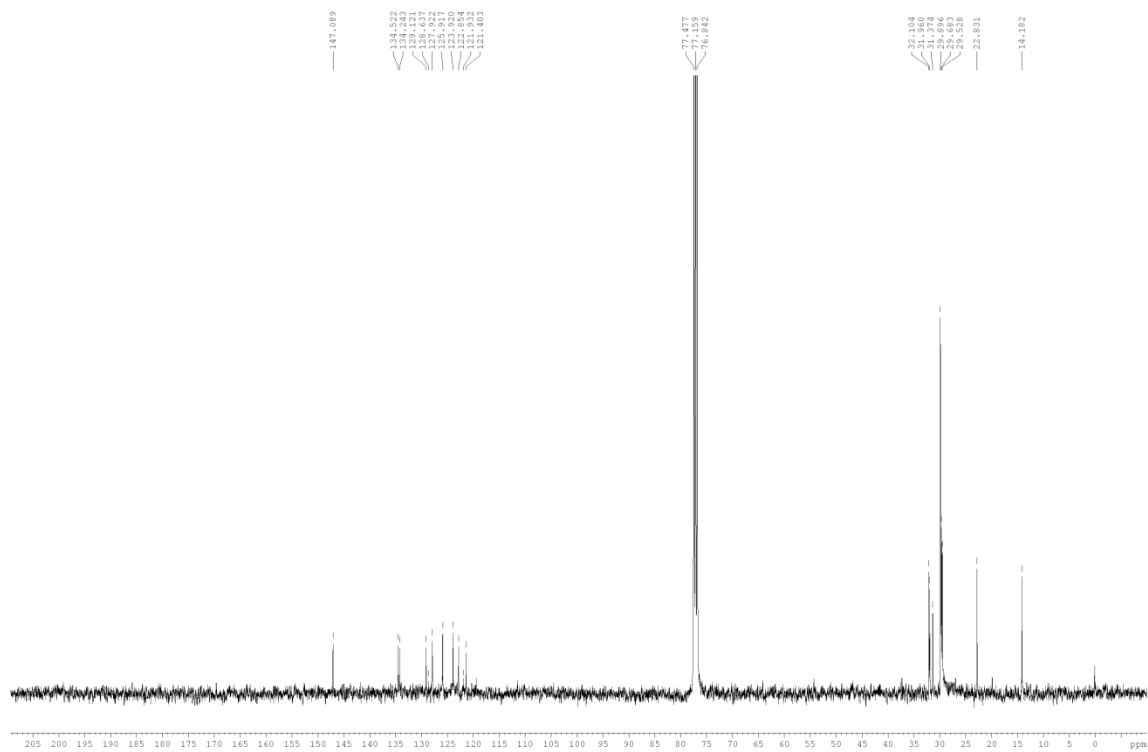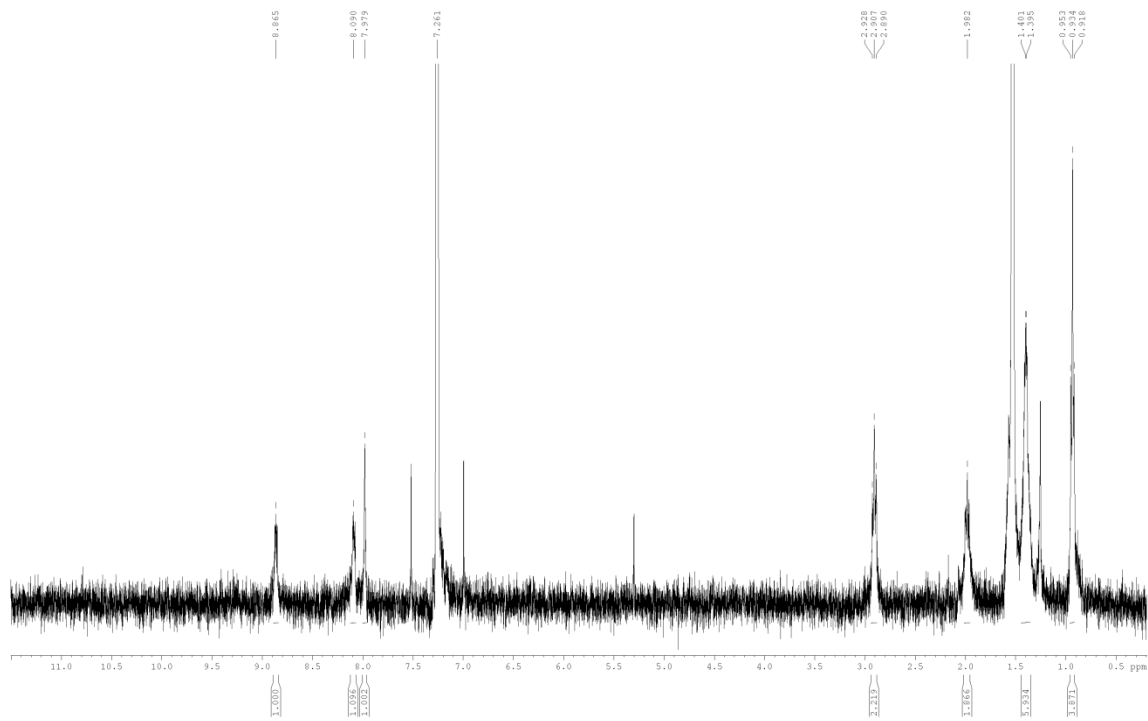

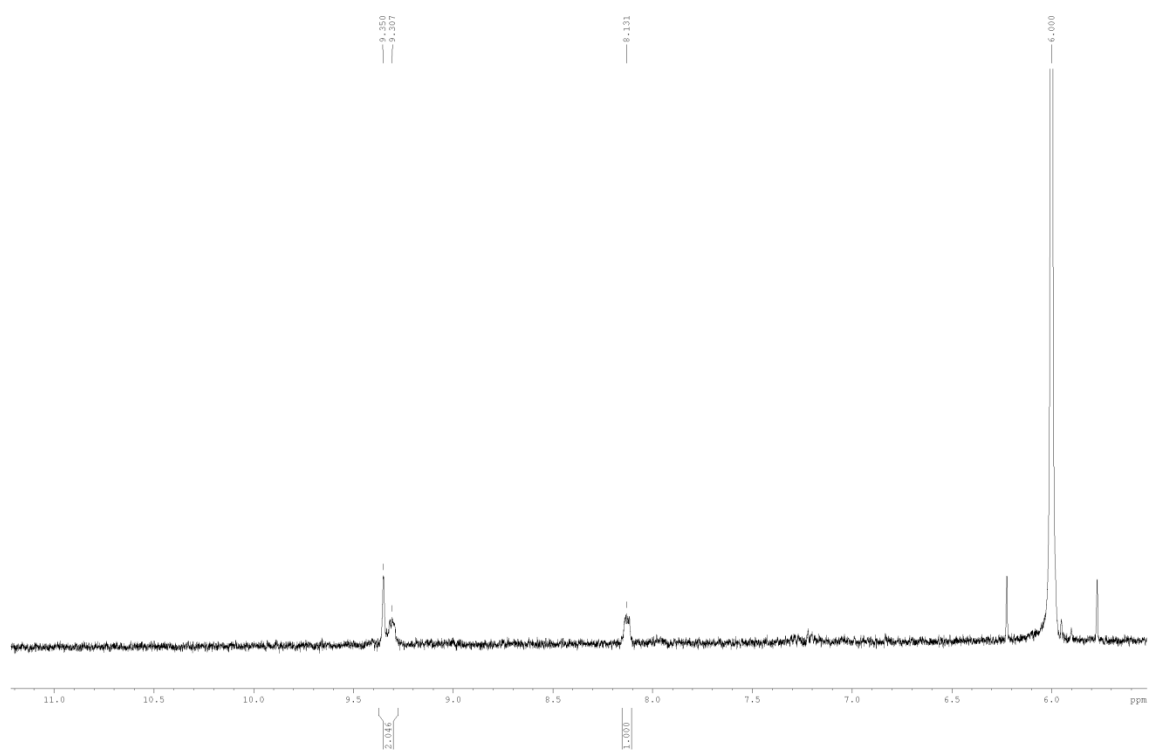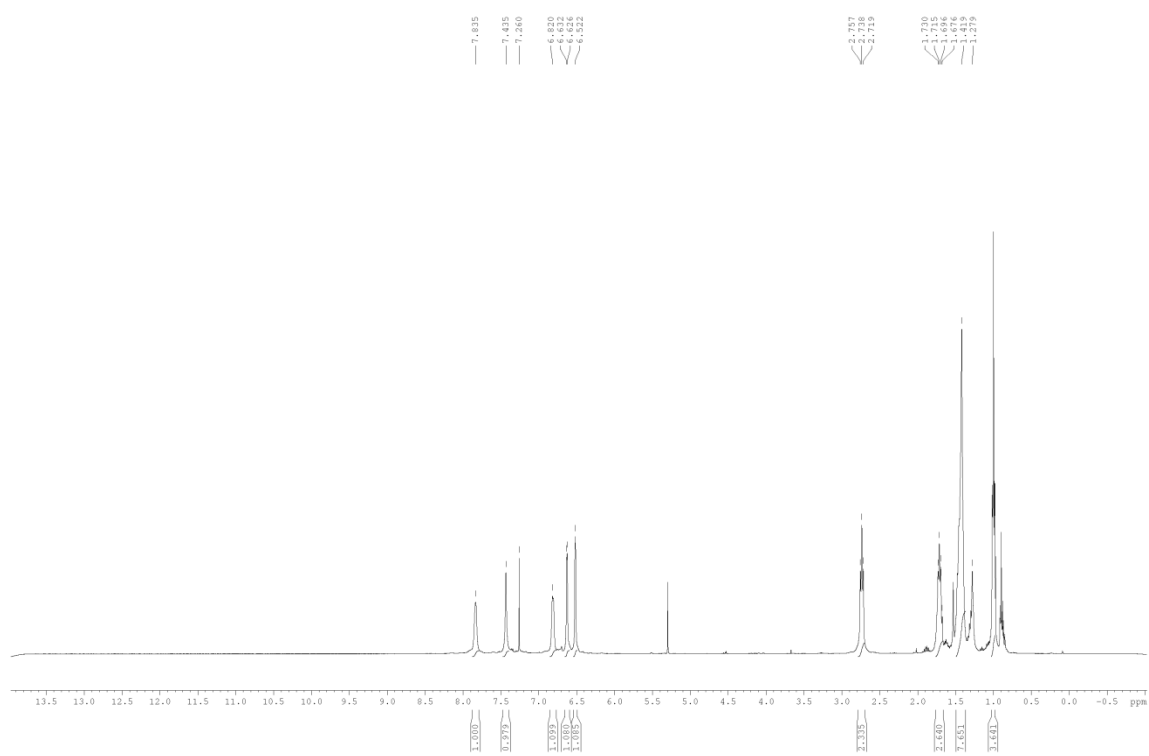

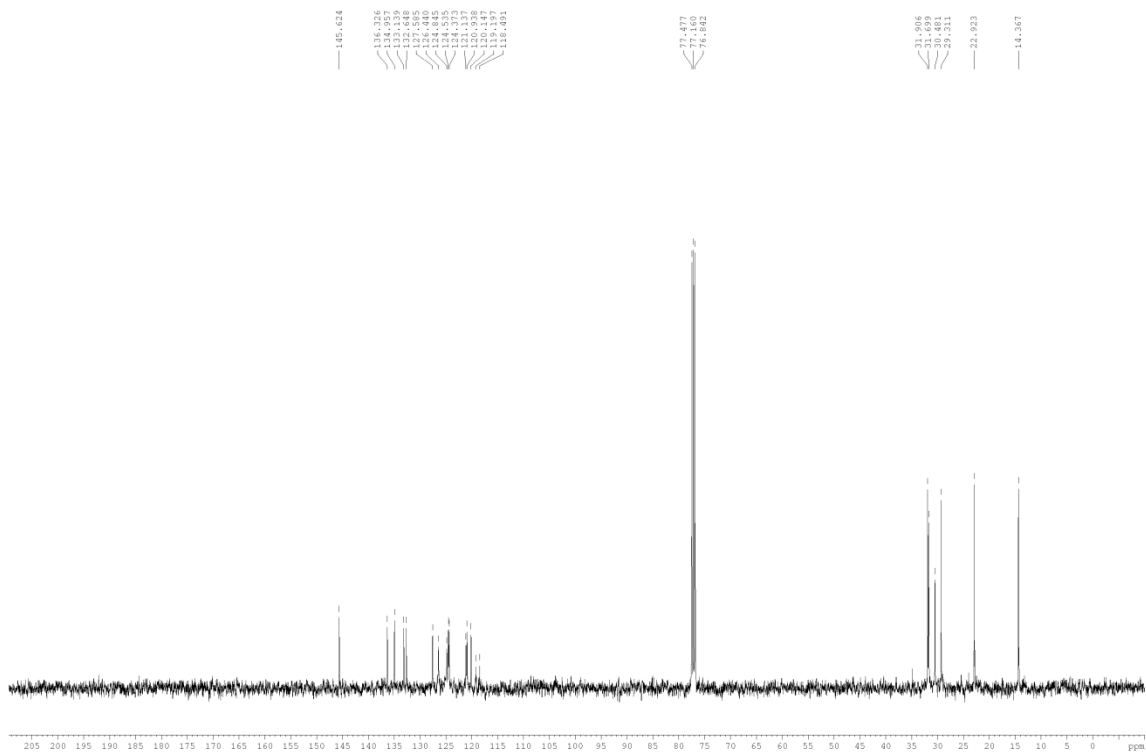

Supplement: c1sc00156f.pdf [file c1sc00156f.pdf]
